# Supplementary material for: Renal UTX-PHGDH-serine axis regulates metabolic disorders in the kidney and liver
Source: PubMed Central journal article supplement (PMC9253056; doi:10.1038/s41467-022-31476-0), 2022-07-04
Supplement: 41467_2022_31476_MOESM1_ESM.pdf [file 41467_2022_31476_MOESM1_ESM.pdf]

## **Supplemental Information**

*for*

### **Renal UTX-PHGDH-Serine axis regulates metabolic disorders in the kidney and liver**

Hong Chen<sup>1</sup>, Chong Liu<sup>2</sup>, Qian Wang<sup>1</sup>, Mingrui Xiong<sup>1</sup>, Xia Zeng<sup>1</sup>, Dong Yang<sup>1</sup>,

Yunhao Xie<sup>2</sup>, Hua Su<sup>3</sup>, Yu Zhang<sup>1</sup>, Yixue Huang<sup>1</sup>, Yuchen Chen<sup>1</sup>, Junqiu Yue<sup>4</sup>,

Chengyu Liu<sup>5</sup>, Shun Wang<sup>5</sup>, Kun Huang<sup>1\*</sup> and Ling Zheng<sup>2,6\*</sup>

<sup>1</sup>Tongji School of Pharmacy, Tongji Medical College, Huazhong University of Science and Technology, Wuhan, China, 430030

<sup>2</sup>Hubei Key Laboratory of Cell Homeostasis, College of Life Sciences, Wuhan University, Wuhan, China, 430072

<sup>3</sup>Department of Nephrology, Union Hospital, Tongji Medical College, Huazhong University of Science and Technology, Wuhan, China, 430030

<sup>4</sup>Department of Pathology, Hubei Cancer Hospital, Tongji Medical College, Huazhong University of Science and Technology, Wuhan, China, 430030.

<sup>5</sup>Department of Blood Transfusion, Wuhan Hospital of Traditional and Western Medicine, Wuhan, China, 430022

<sup>6</sup>Frontier Science Center for Immunology and Metabolism, Wuhan University, Wuhan, China, 430072

*Corresponding authors*

Ling Zheng, Ph.D.

College of Life Sciences

Wuhan University

Wuhan, China 430072

lzheng@whu.edu.cn

Kun Huang, Ph.D.

Tongji School of Pharmacy

Huazhong Univ. of Sci. & Tech.

Wuhan, China, 430030

kunhuang@hust.edu.cn

**This supplementary file contains 22 Supplementary Figures and 11 Supplementary Tables.**

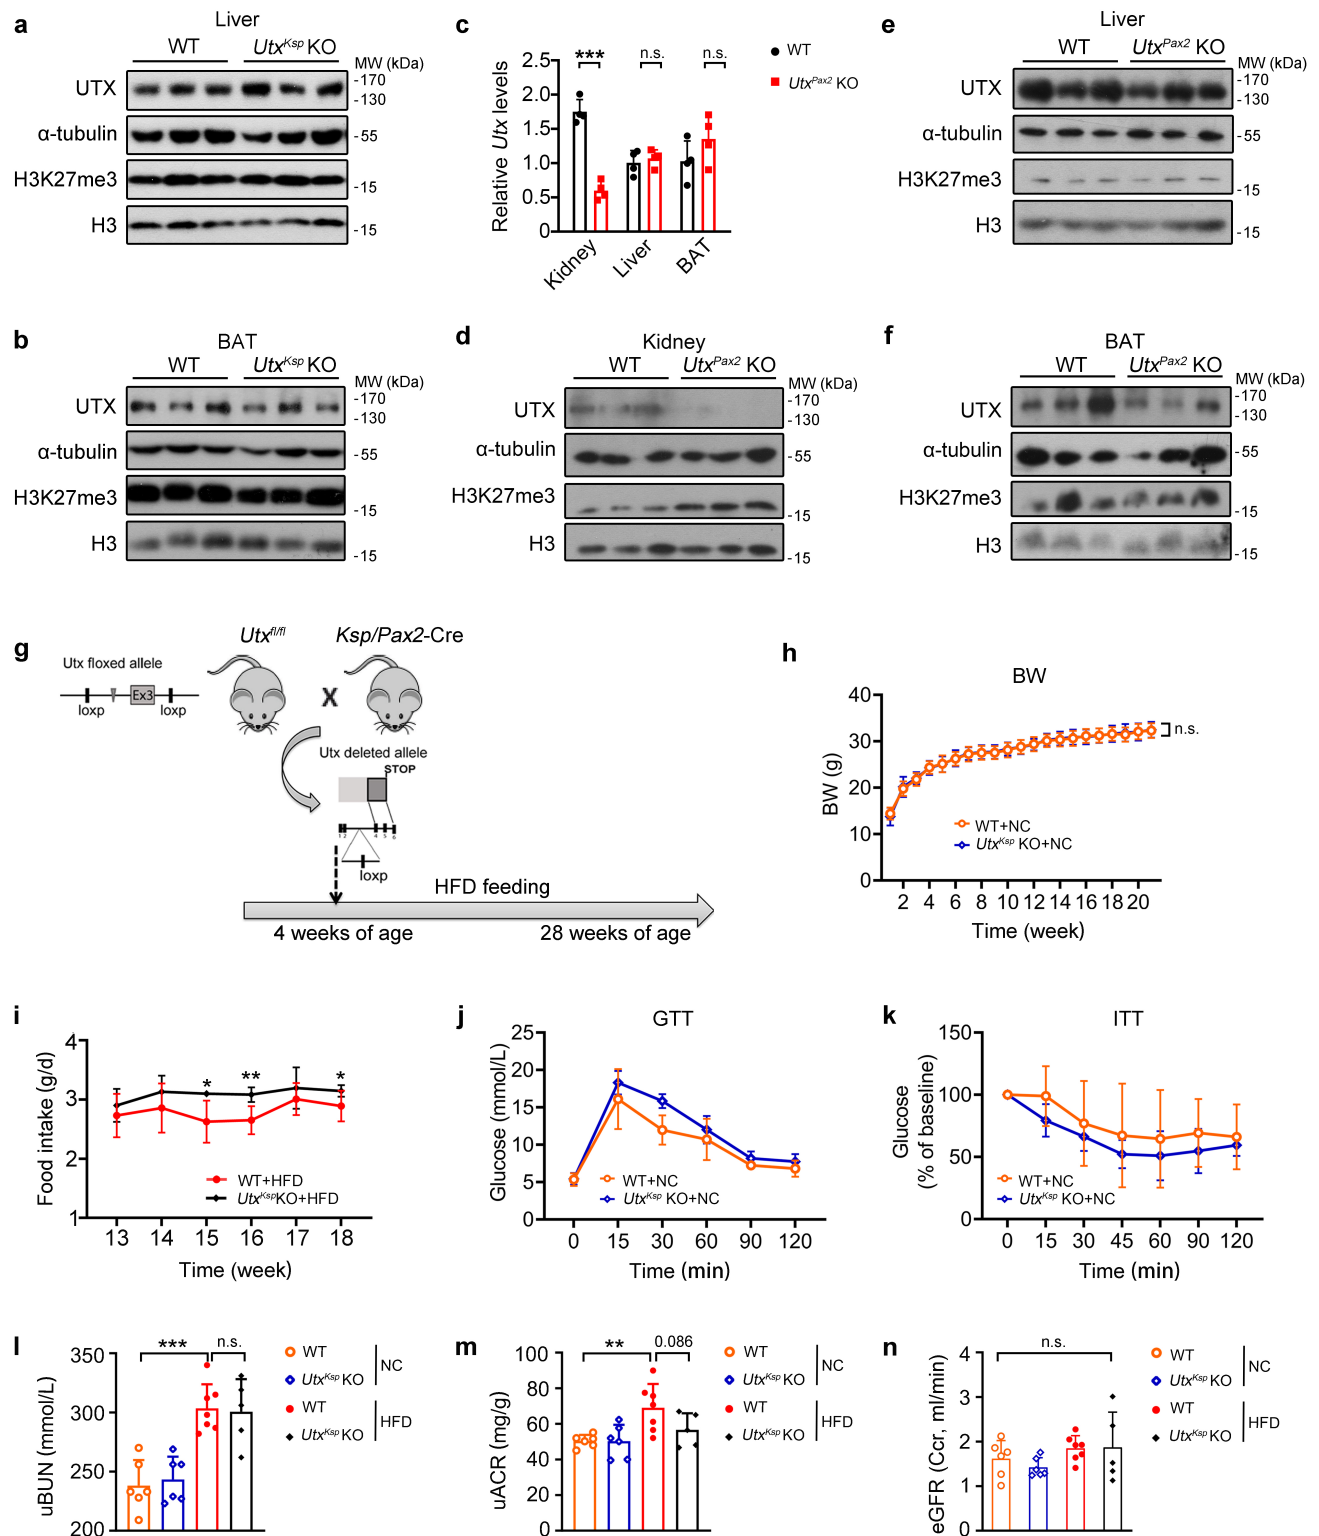

**Supplementary Fig. 1** *Utx*<sup>Ksp</sup> KO mice showed no obvious phenotype under normal chow-fed conditions, and showed no obvious effect on food intake and renal functions

**under HFD-fed conditions. a-b**, Western blot analysis of UTX levels in the liver (**a**) and BAT (**b**) of male WT and  $Utx^{Ksp}$  KO mice, n = 6 independent animals. **c-f**, qPCR (**c**) and Western blot analysis (**d-f**) of UTX levels in the kidney (**d**), liver (**e**) and BAT (**f**) of male WT and  $Utx^{Pax2}$  KO mice. c, n = 4 independent animals (mean  $\pm$  SD),  $^{***}P_{kidney} < 0.0001$  (unpaired, two-tailed t-test); d-f, n = 3 independent animals. **g**, Experimental design for breeding and HFD feeding. **h-i**, Growth curves (**h**) and food intake (**i**) of indicated groups. h, n = 6 independent animals; i, n = 8 or 6 independent animals for WT+HFD or  $Utx^{Ksp}$  KO +HFD group, respectively (mean  $\pm$  SD, unpaired, two-tailed t-test).  $^{*}P_{15-week} = 0.0406$ ,  $^{**}P_{16-week} = 0.0011$ ,  $^{*}P_{18-week} = 0.0294$  (unpaired, two-tailed t-test). **j-k**, Glucose tolerance test (GTT; **j**) and insulin tolerance test (ITT; **k**) results of WT and  $Utx^{Ksp}$  KO mice fed with normal chow, j, n = 3 independent animals; k, n = 6 independent animals (mean  $\pm$  SD). **l-n**, urine blood urea nitrogen (uBUN; **l**), urine albumin to creatinine ratios (uACR; **m**) and estimated glomerular filtration rate (eGFR; **n**) levels of indicated groups, l-n, n = 6, 6, 7, 5 independent animals for WT+NC or  $Utx^{Ksp}$  KO+NC or WT+HFD or  $Utx^{Ksp}$  KO +HFD group, respectively (mean  $\pm$  SD).  $^{***}P_{uBUN (WT+NC vs WT+HFD)} < 0.0001$ ;  $^{**}P_{uACR (WT+NC vs WT+HFD)} = 0.0069$  (unpaired, two-tailed t-test). WT+NC, wild-type mice fed with normal chow;  $Utx^{Ksp}$  KO+NC,  $Utx^{Ksp}$  KO mice fed with normal chow; WT+HFD, wild-type mice fed with high fat diet;  $Utx^{Ksp}$  KO +HFD,  $Utx^{Ksp}$  KO mice fed with high fat diet. Source data are provided in the Source Data file.

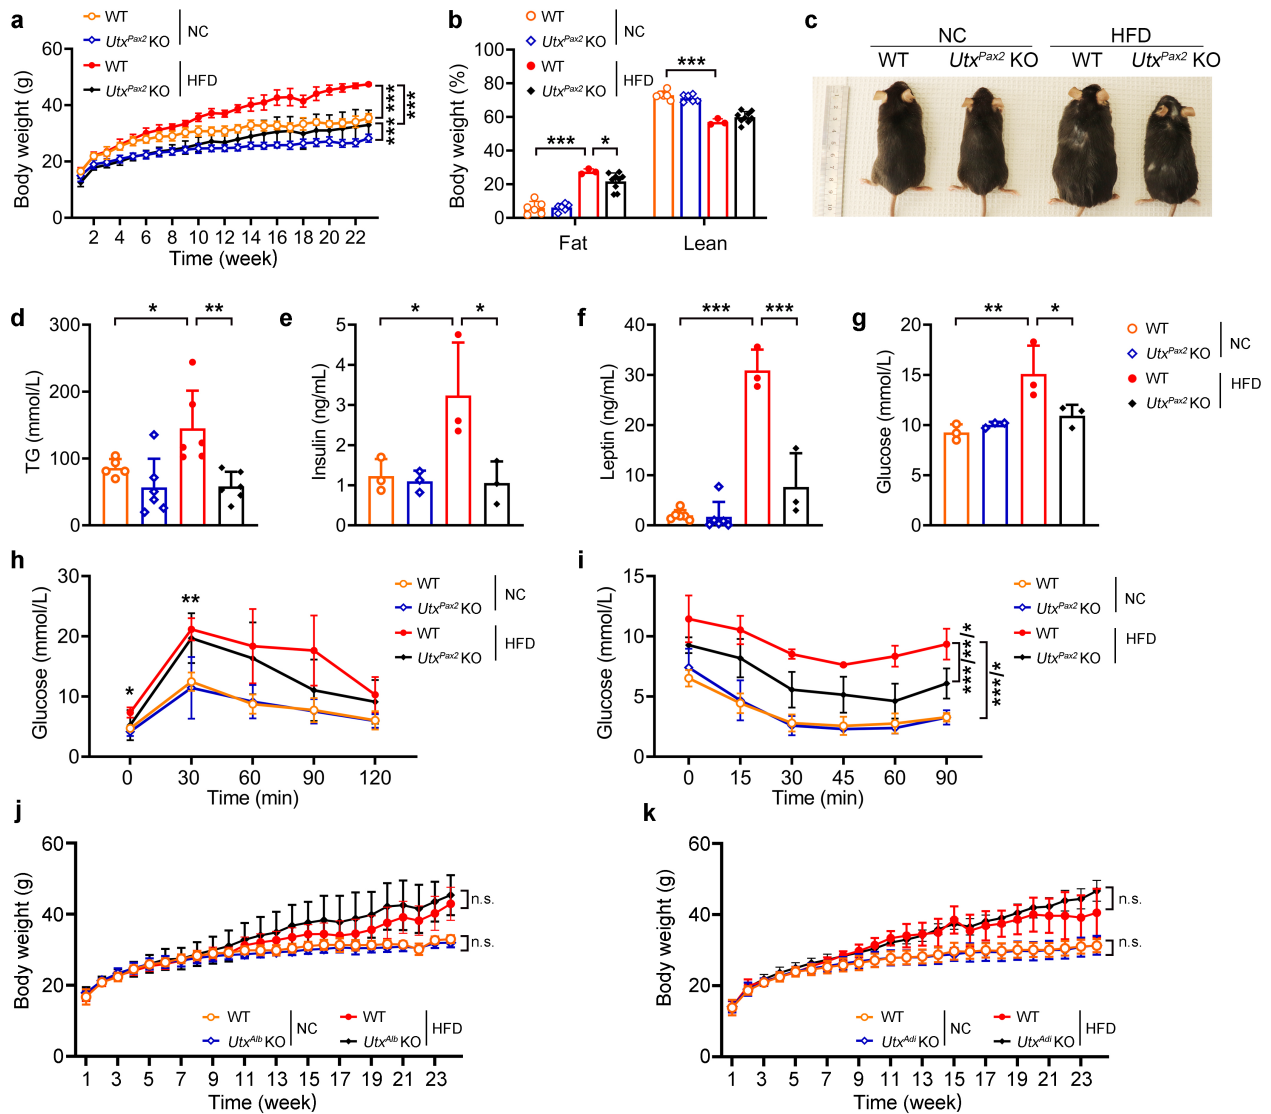

**Supplementary Fig. 2 Reduced body weight, fat mass, blood insulin, leptin and glucose levels in *Utx<sup>Pax2</sup>* KO male mice fed with HFD, and no obvious phenotype was observed in NC- or HFD-fed *Utx<sup>Alb</sup>* KO or *Utx<sup>Adi</sup>* KO male mice. **a**, Growth curves of WT and *Utx<sup>Pax2</sup>* KO mice fed with NC or HFD, n = 6, 6, 3, 9 independent animals for WT+NC or *Utx<sup>Pax2</sup>* KO+NC or WT+HFD or *Utx<sup>Pax2</sup>* KO +HFD group, respectively (mean ± SD). \*\*\**P*<sub>body weight</sub> (WT+NC vs WT+HFD) < 0.0001, \*\*\**P*<sub>body weight</sub> (WT+NC vs *Utx<sup>Pax2</sup>* KO+NC) < 0.0001, \*\*\**P*<sub>body weight</sub> (WT+HFD vs *Utx<sup>Pax2</sup>* KO+HFD) < 0.0001 (one-way ANOVA). **b**, Body composition, n = 6, 6, 3, 9 independent animals for WT+NC or *Utx<sup>Pax2</sup>* KO+NC or WT+HFD or *Utx<sup>Pax2</sup>* KO +HFD group, respectively (mean ± SD). \*\*\**P*<sub>Fat</sub> (WT+NC vs WT+HFD) < 0.0001, \**P*<sub>Fat</sub> (WT+HFD vs *Utx<sup>Pax2</sup>* KO+HFD) =**

0.0125;  $***P_{Lean} (WT+NC \text{ vs } WT+HFD) < 0.0001$  (one-way ANOVA). **c**, Abdominal view of WT and  $Utx^{Pax2}$  KO mice under NC or HFD conditions. **d-g**, Blood TG, insulin, leptin and glucose levels of WT and  $Utx^{Pax2}$  KO mice fed with NC or HFD. d, n = 5, 6, 6, 6 independent animals for WT+NC or  $Utx^{Pax2}$  KO+NC or WT+HFD or  $Utx^{Pax2}$  KO +HFD group, respectively; e, n = 3 independent animals; f, n = 6, 6, 3, 3 independent animals for WT+NC or  $Utx^{Pax2}$  KO+NC or WT+HFD or  $Utx^{Pax2}$  KO +HFD group, respectively; g, n = 3 independent animals (mean  $\pm$  SD).  $*P_{TG} (WT+NC \text{ vs } WT+HFD) = 0.0493$ ,  $**P_{TG} (WT+HFD \text{ vs } Utx^{Pax2} \text{ KO+HFD}) = 0.0026$ ;  $*P_{Insulin} (WT+NC \text{ vs } WT+HFD) = 0.0287$ ,  $*P_{Insulin} (WT+HFD \text{ vs } Utx^{Pax2} \text{ KO+HFD}) = 0.0192$ ;  $***P_{Leptin} (WT+NC \text{ vs } WT+HFD) < 0.0001$ ,  $***P_{Leptin} (WT+HFD \text{ vs } Utx^{Pax2} \text{ KO+HFD}) < 0.0001$ ;  $**P_{Glucose} (WT+NC \text{ vs } WT+HFD) = 0.0048$ ,  $*P_{Glucose} (WT+HFD \text{ vs } Utx^{Pax2} \text{ KO+HFD}) = 0.0288$  (one-way ANOVA). **h-i**, Glucose tolerance test (GTT) and insulin tolerance test (ITT) results of the indicated groups. h, n = 3, 3, 3, 6 independent animals for WT+NC or  $Utx^{Pax2}$  KO+NC or WT+HFD or  $Utx^{Pax2}$  KO +HFD group, respectively; i, n = 5, 5, 4, 6 independent animals for WT+NC or  $Utx^{Pax2}$  KO+NC or WT+HFD or  $Utx^{Pax2}$  KO +HFD group, respectively (mean  $\pm$  SD).  $*P_{GTT} (0, WT+NC \text{ vs } WT+HFD) = 0.0171$ ,  $**P_{GTT} (30, WT+NC \text{ vs } WT+HFD) = 0.0037$ ;  $*P_{ITT} (0, WT+NC \text{ vs } WT+HFD) = 0.0108$ ,  $***P_{ITT} (15, WT+NC \text{ vs } WT+HFD) = 0.0003$ ,  $***P_{ITT} (30, WT+NC \text{ vs } WT+HFD) < 0.0001$ ,  $***P_{ITT} (45, WT+NC \text{ vs } WT+HFD) < 0.0001$ ,  $***P_{ITT} (60, WT+NC \text{ vs } WT+HFD) < 0.0001$ ,  $***P_{ITT} (90, WT+NC \text{ vs } WT+HFD) < 0.0001$ ,  $*P_{ITT} (15, WT+HFD \text{ vs } Utx^{Pax2} \text{ KO+HFD}) = 0.0292$ ,  $**P_{ITT} (30, WT+HFD \text{ vs } Utx^{Pax2} \text{ KO+HFD}) = 0.0035$ ,  $**P_{ITT} (45, WT+HFD \text{ vs } Utx^{Pax2} \text{ KO+HFD}) = 0.0095$ ,  $***P_{ITT} (60, WT+HFD \text{ vs } Utx^{Pax2} \text{ KO+HFD}) = 0.0009$ ,  $**P_{ITT} (90, WT+HFD \text{ vs } Utx^{Pax2} \text{ KO+HFD}) = 0.0061$  (one-way ANOVA). **j-k**, Growth curves of WT and  $Utx^{Alb}$  KO or  $Utx^{Adi}$  KO mice fed with NC or HFD. j, n = 6, 5, 6, 6 independent animals for WT+NC or  $Utx^{Alb}$  KO+NC or WT+HFD or  $Utx^{Alb}$  KO +HFD group, respectively; k, n = 9, 9, 6, 6 independent animals for WT+NC or  $Utx^{Adi}$  KO+NC or WT+HFD or  $Utx^{Adi}$  KO +HFD group, respectively (mean  $\pm$  SD, one-way ANOVA). WT+NC, wild-type mice fed with normal chow;  $Utx^{Pax2}/Utx^{Alb}/Utx^{Adi}$  KO+NC,  $Utx^{Pax2}/Utx^{Alb}/Utx^{Adi}$  KO mice fed with normal chow; WT+HFD, wild-type mice fed with high fat diet;  $Utx^{Pax2}/Utx^{Alb}/Utx^{Adi}$  KO +HFD,  $Utx^{Pax2}/Utx^{Alb}/Utx^{Adi}$  KO mice fed with high fat diet. Source data are provided in the Source Data file.

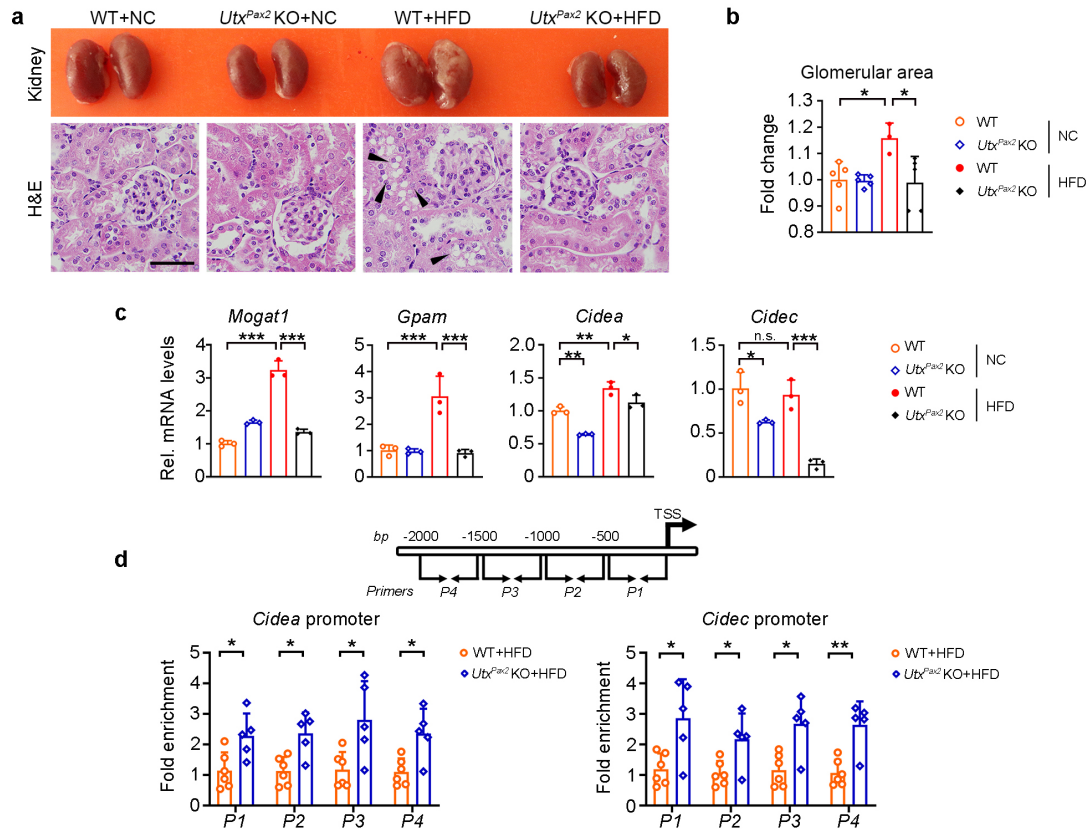

**Supplementary Fig. 3 HFD-fed *Utx*<sup>Pax2</sup> KO mice showed reduced lipid accumulation in the kidney.** **a-b**, Representative kidneys and representative images of H&E staining in the WT and *Utx*<sup>Pax2</sup> KO mice fed with NC or HFD (**a**), with quantitative data for relative glomerular area (**b**), n = 5, 5, 3, 5 independent animals for WT+NC or *Utx*<sup>Pax2</sup> KO+NC or WT+HFD or *Utx*<sup>Pax2</sup> KO +HFD group, respectively (mean ± SD). \* $P_{H\&E} (WT+NC \text{ vs } WT+HFD) = 0.0182$ , \* $P_{H\&E} (WT+HFD \text{ vs } Utx^{Pax2} KO+HFD) = 0.012$  (one-way ANOVA). Scale bar, 50  $\mu\text{m}$ . **c**, qPCR analysis for TG synthesis and storage related genes in the indicated groups, n = 3 independent animals (mean ± SD). \*\*\* $P_{Mogat1} (WT+NC \text{ vs } WT+HFD) < 0.0001$ , \*\*\* $P_{Mogat1} (WT+HFD \text{ vs } Utx^{Pax2} KO+HFD) < 0.0001$ ; \*\*\* $P_{Gpam} (WT+NC \text{ vs } WT+HFD) = 0.0007$ , \*\*\* $P_{Gpam} (WT+HFD \text{ vs } Utx^{Pax2} KO+HFD) = 0.0005$ ; \*\* $P_{Cidea} (WT+NC \text{ vs } Utx^{Pax2} KO+NC) = 0.0021$ , \*\* $P_{Cidea} (WT+NC \text{ vs } WT+HFD) = 0.0031$ , \* $P_{Cidea} (WT+HFD \text{ vs } Utx^{Pax2} KO+HFD) = 0.0385$ ; \* $P_{Cidec} (WT+NC \text{ vs } Utx^{Pax2} KO+NC) = 0.0281$ , \*\*\* $P_{Cidec} (WT+HFD \text{ vs } Utx^{Pax2} KO+HFD) = 0.0003$ , (one-way ANOVA). **d**, ChIP assay for H3K27me3 on the promoters of *Cidea* and *Cidec* in indicated groups, n = 6, 5 independent animals for

WT+HFD or  $Utx^{Pax2}$  KO +HFD group, respectively (mean  $\pm$  SD).  $*P_{Cidea P1} = 0.0244$ ,  $*P_{Cidea P2} = 0.0113$ ;  $*P_{Cidea P3} = 0.0424$ ,  $*P_{Cidea P4} = 0.0212$ ;  $*P_{Cidec P1} = 0.0394$ ,  $*P_{Cidec P2} = 0.0376$ ,  $*P_{Cidec P3} = 0.0152$ ,  $**P_{Cidec P4} = 0.006$  (unpaired, two-tailed t-test). TSS, transcription start site. WT+NC, wild-type mice fed with normal chow;  $Utx^{Pax2}$  KO+NC,  $Utx^{Pax2}$  KO mice fed with normal chow; WT+HFD, wild-type mice fed with high fat diet;  $Utx^{Pax2}$  KO+HFD,  $Utx^{Pax2}$  KO mice fed with high fat diet. Source data are provided in the Source Data file.



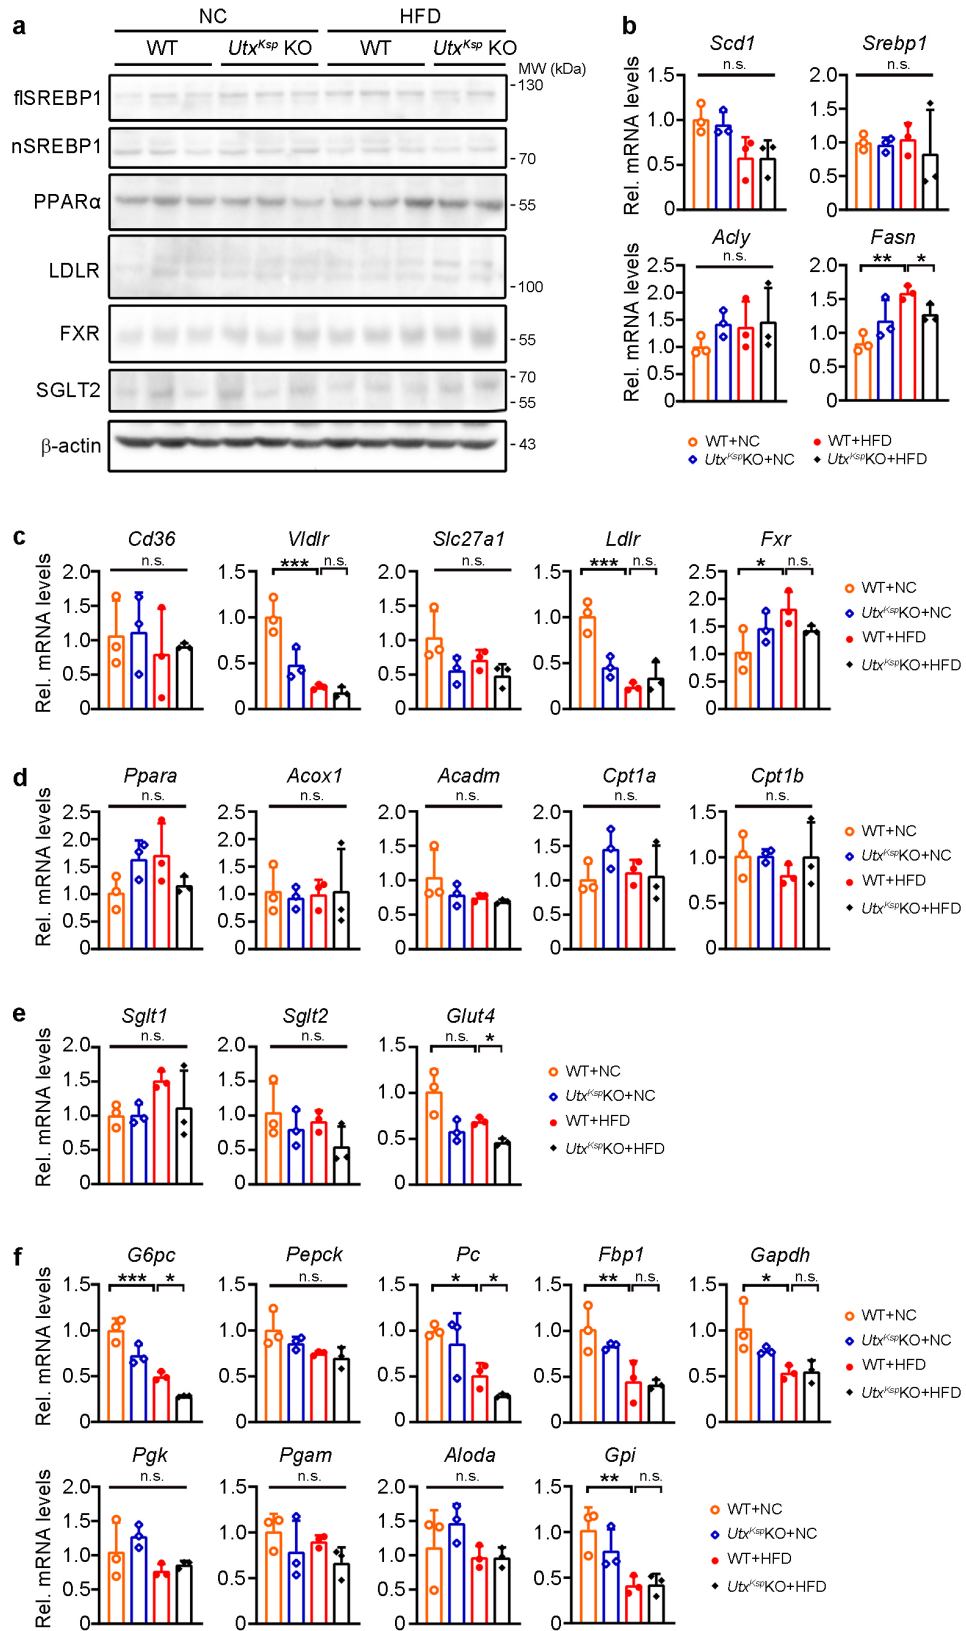

**Supplementary Fig. 4 HFD-fed *Utx<sup>Ksp</sup>* KO mice showed mild effects on glucose and lipid metabolic pathways in the renal cortex. a,**

Western blot analysis of SREBP1, PPAR $\alpha$ , FXR, LDLR and SGLT2 in the WT and *Utx<sup>Ksp</sup>* KO mice under NC- and HFD-fed conditions, n = 3, 3, 3, 2 independent animals for WT+NC or *Utx<sup>Ksp</sup>* KO+NC or WT+HFD or *Utx<sup>Ksp</sup>* KO +HFD group, respectively. **b-f,** qPCR results of genes involved in lipid synthesis (**b**), lipid transport (**c**), beta oxidation (**d**), glucose transport (**e**), glyconeogenesis and glycolysis pathways (**f**) in the WT and *Utx<sup>Ksp</sup>* KO mice under NC- and HFD-fed conditions, n = 3 independent animals (mean  $\pm$  SD). \*\* $P_{Fasn}$  (WT+NC vs WT+HFD) = 0.0033,

\* $P_{Fasn}$  (WT+HFD vs *Utx<sup>Ksp</sup>* KO+HFD) = 0.0401; \*\*\* $P_{Vldlr}$  (WT+NC vs WT+HFD) = 0.0003; \*\*\* $P_{Ldlr}$  (WT+NC vs WT+HFD) = 0.0003; \* $P_{Fxr}$  (WT+NC vs WT+HFD) = 0.0249; \* $P_{Glut4}$  (WT+HFD vs *Utx<sup>Ksp</sup>* KO+HFD) = 0.0454; \*\*\* $P_{G6pc}$  (WT+NC vs WT+HFD) = 0.0003; \* $P_{G6pc}$  (WT+HFD vs *Utx<sup>Ksp</sup>* KO+HFD) = 0.039; \* $P_{Pc}$  (WT+NC vs WT+HFD) = 0.0277, \* $P_{Pc}$  (WT+HFD vs *Utx<sup>Ksp</sup>* KO+HFD) = 0.0495; \*\* $P_{Fbp1}$  (WT+NC vs WT+HFD) = 0.0091; \* $P_{Gapdh}$  (WT+NC vs WT+HFD) = 0.0124; \*\* $P_{Gpi}$  (WT+NC vs WT+HFD) = 0.0099 (one-way ANOVA).

Source data are provided in the Source Data file.

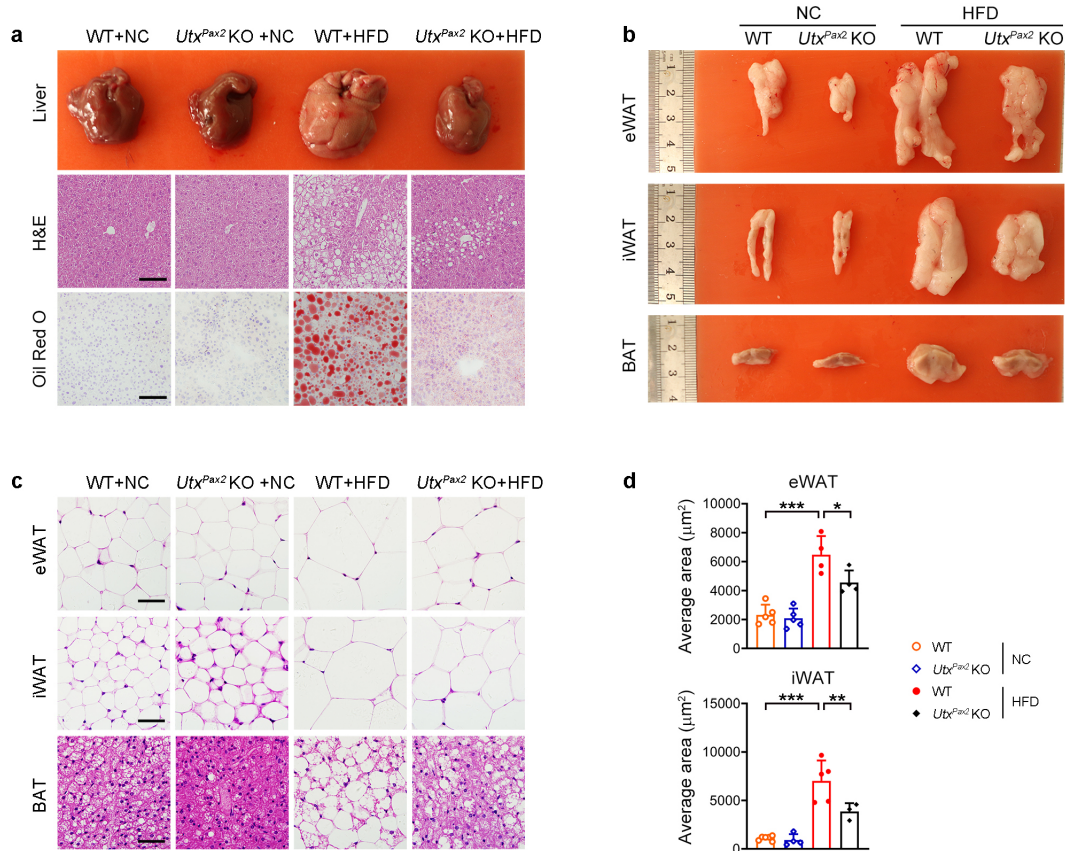

**Supplementary Fig. 5 HFD-fed *Utx<sup>Pax2</sup>* KO mice show reduced lipid accumulation in the liver and adipose tissues.** **a**, Representative images of livers and images of H&E and Oil Red O staining in the liver tissue of WT and *Utx<sup>Pax2</sup>* KO mice fed with NC or HFD,  $n = 3-6$  independent animals. **b**, Representative images of different fat tissues,  $n = 3-6$  independent animals. **c-d**, H&E staining and average cell area in indicated groups,  $n_{\text{eWAT}} = 5, 5, 4, 4$  independent animals for WT+NC or *Utx<sup>Pax2</sup>* KO+NC or WT+HFD or *Utx<sup>Pax2</sup>* KO +HFD group, respectively;  $n_{\text{iWAT}} = 6, 4, 5, 3$  independent animals for WT+NC or *Utx<sup>Pax2</sup>* KO+NC or WT+HFD or *Utx<sup>Pax2</sup>* KO +HFD group, respectively, data shown as mean  $\pm$  SD.  $***P_{\text{eWAT}}(\text{WT+NC vs WT+HFD}) < 0.0001$ ,  $*P_{\text{eWAT}}(\text{WT+HFD vs } Utx^{Pax2} \text{ KO+HFD}) = 0.0212$ ;  $***P_{\text{iWAT}}(\text{WT+NC vs WT+HFD}) < 0.0001$ ,  $**P_{\text{iWAT}}(\text{WT+HFD vs } Utx^{Pax2} \text{ KO+HFD}) = 0.0087$  (one-way ANOVA). WT+NC, wild-type mice fed with normal chow; *Utx<sup>Pax2</sup>* KO+NC, *Utx<sup>Pax2</sup>* KO mice fed with normal chow; WT+HFD, wild-type mice fed with high fat diet; *Utx<sup>Pax2</sup>* KO+HFD, *Utx<sup>Pax2</sup>* KO mice fed with high fat diet. Source data are provided in the Source Data file.

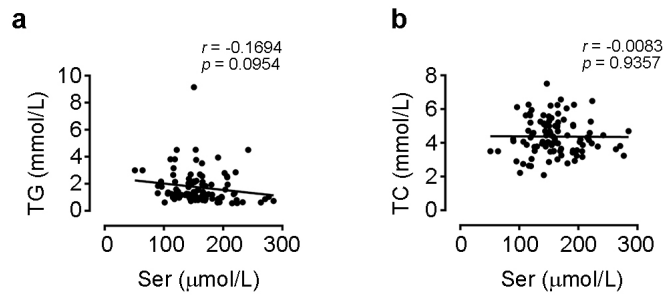

**Supplementary Fig. 6 Correlation between serum serine level and triglycerides or cholesterol.** Correlation analysis between the serum serine level and serum triglycerides (TG; **a**), or serum cholesterol (TC; **b**) from individuals with normal body weight ( $n = 39$ ), overweight ( $n = 23$ ), obesity ( $n = 24$ ) or obesity-related renal dysfunction ( $n = 12$ ). Correlation analysis was performed by Pearson's method. The Pearson correlation coefficients and  $p$  values (two-tailed test) are shown. Source data are provided in the Source Data file.

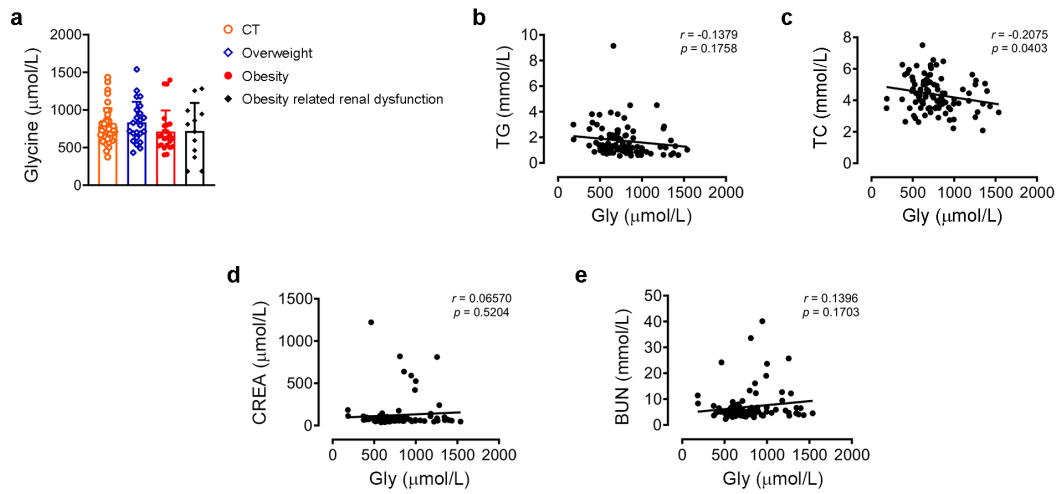

**Supplementary Fig. 7 Correlation between serum glycine level and different parameters.** **a**, Serum glycine level of indicated groups. Data shown as mean  $\pm$  SD. **b-e**, Correlation analysis between the serum glycine level and serum triglycerides (TG; **b**), cholesterol (TC; **c**), creatinine (CREA; **d**) and BUN (blood urea nitrogen; **e**) level from individuals with normal body weight ( $n = 39$ ), overweight ( $n = 23$ ), obesity ( $n = 24$ ) or obesity-related renal dysfunction ( $n = 12$ ). Correlation analysis was performed by Pearson's method. The Pearson correlation coefficients and  $p$  values (two-tailed test) are shown. Source data are provided in the Source Data file.

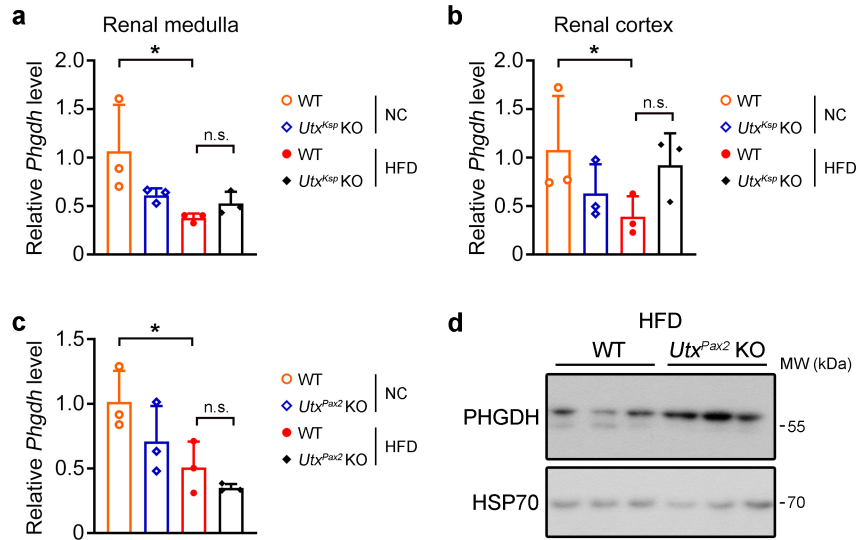

**Supplementary Fig. 8** *Utx* knockout showed no effect on *Phgdh* mRNA level but a significant increase of its protein level in the kidneys of *Utx<sup>Pax2</sup>* KO mice under HFD stress. qPCR analysis of *Phgdh* levels in the renal medulla (a) and cortex (b) of WT and *Utx<sup>Ksp</sup>* KO mice, and in the kidneys of WT and *Utx<sup>Pax2</sup>* KO mice (c) under NC or HFD conditions, n = 3 independent animals (mean ± SD). (a)\* $P_{(WT+NC \text{ vs } WT+HFD)} = 0.0244$ ; (b)\* $P_{(WT+NC \text{ vs } WT+HFD)} = 0.0495$ ; (c)\* $P_{(WT+NC \text{ vs } WT+HFD)} = 0.0435$  (one-way ANOVA). d, PHGDH level in the kidney of WT and *Utx<sup>Pax2</sup>* KO mice fed with HFD, n = 3 independent animals. WT+NC, wild-type mice fed with normal chow; *Utx<sup>Ksp/Pax2</sup>* KO+NC, *Utx<sup>Ksp/Pax2</sup>* KO mice fed with normal chow; WT+HFD, wild-type mice fed with high fat diet; *Utx<sup>Ksp/Pax2</sup>* KO+HFD, *Utx<sup>Ksp/Pax2</sup>* KO mice fed with high fat diet. Source data are provided in the Source Data file.

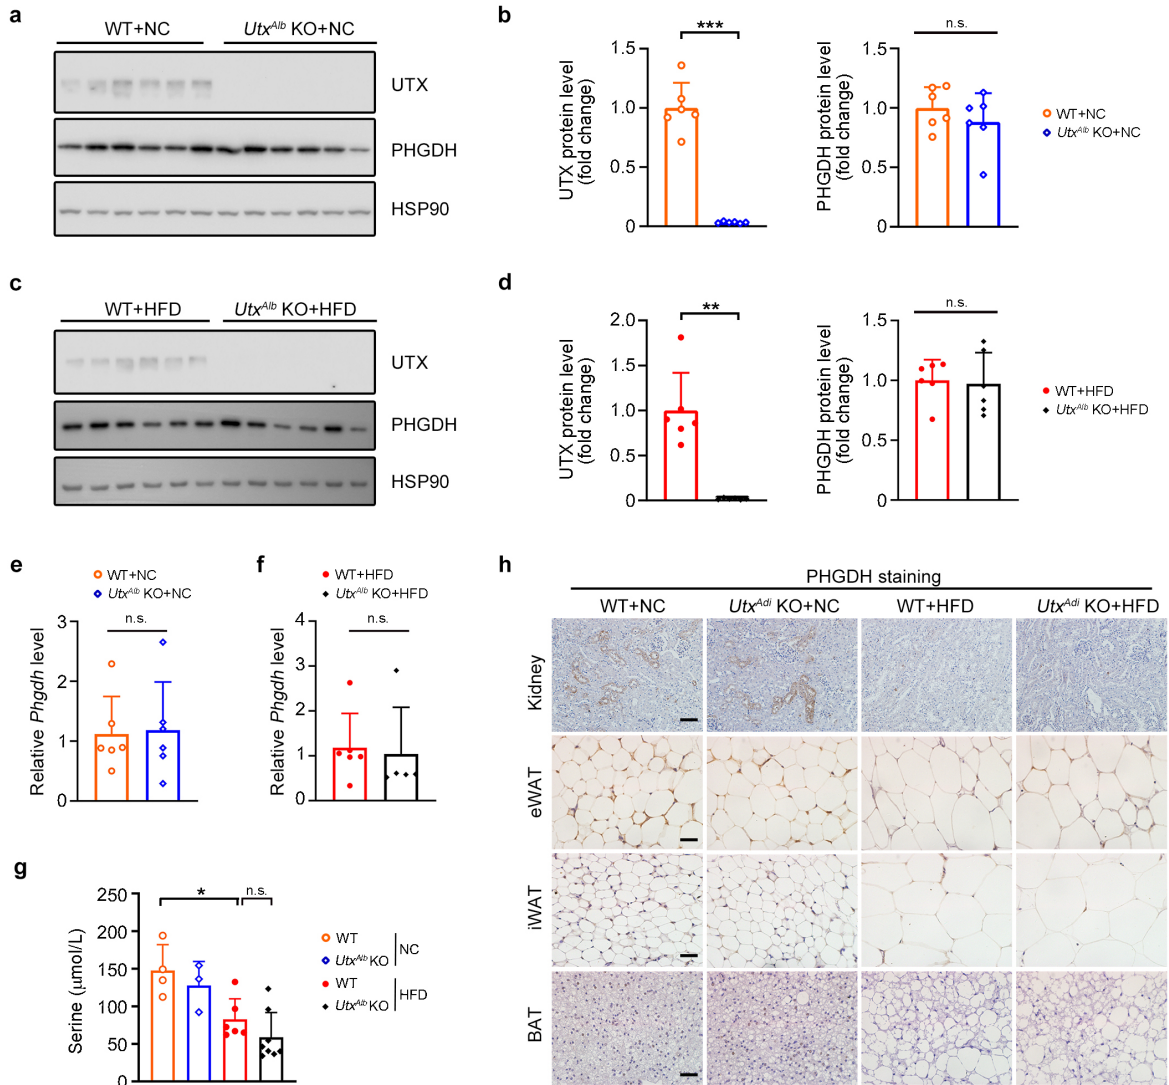

**Supplementary Fig. 9 Liver or adipose tissue specific knockout *Utx* showed no effect on PHGDH or serine levels in male mice.** **a-d**, Representative Western blots and densitometric quantitative results of UTX, and PHGDH in the liver of WT and *Utx<sup>Alb</sup>* KO mice under NC (**a-b**) or HFD (**c-d**) conditions,  $n = 6$  independent animals (mean  $\pm$  SD). (**b**)  $***P_{UTX} = 0.0001$ ; (**d**)  $**P_{UTX} = 0.0022$  (unpaired, two-tailed t-test). **e-f**, qPCR analysis of *Phdgh* levels in the liver of WT and *Utx<sup>Alb</sup>* KO mice under NC (**e**) or HFD (**f**) conditions,  $n = 6$  independent animals (mean  $\pm$  SD, unpaired, two-tailed t-test). **g**, Serum serine level of indicated groups,  $n = 4, 3, 6, 8$  independent animals for WT+NC or *Utx<sup>Alb</sup>* KO+NC or WT+HFD or *Utx<sup>Alb</sup>* KO +HFD group, respectively (mean  $\pm$  SD).  $*P_{serine} (WT+NC \text{ vs } WT+HFD) = 0.0144$  (one-way ANOVA). **h**,

Representative images of PHGDH staining in WT and *Utx<sup>Adi</sup>* KO mice under NC or HFD conditions, n = 3-6 independent animals. Scale bar, 50  $\mu$ m. Source data are provided in the Source Data file.



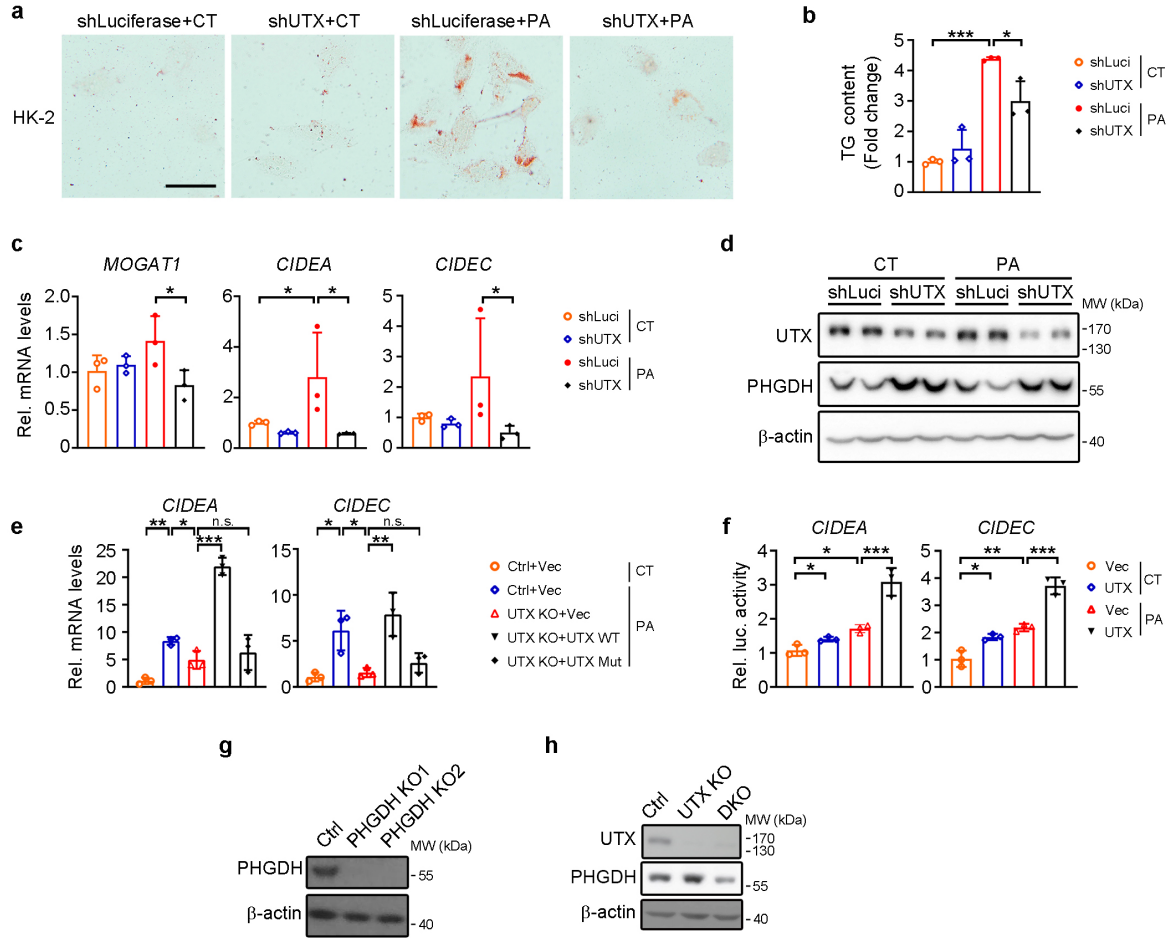

**Supplementary Fig. 10 UTX regulated lipid accumulation in HK-2 cells.**

Representative images of Oil Red O staining (**a**) and TG concentrations (**b**) in HK-2 cells with or without UTX knockdown, n = 3 biological samples per group (mean ± SD).  $***P_{TG}$  ( $shLuci+CT$  vs  $shLuci+PA$ ) < 0.0001,  $*P_{TG}$  ( $shLuci+PA$  vs  $shUTX+PA$ ) = 0.0142 (one-way ANOVA). Scale bar, 50 μm. **c**, Transcriptional changes of TG synthesis/lipid storage related genes in indicated groups, n = 3 biological samples per group (mean ± SD).  $*P_{MOGAT1}(shLuci+PA$  vs  $shUTX+PA)$  = 0.0322;  $*P_{CIDEA}(shLuci+CT$  vs  $shLuci+PA)$  = 0.0495,  $*P_{CIDEA}(shLuci+PA$  vs  $shUTX+PA)$  = 0.036;  $*P_{CIDEA}(shLuci+PA$  vs  $shUTX+PA)$  = 0.0495 (one-way ANOVA). **d**, Western blot analysis of PHGDH levels in UTX knockdown HK-2 cells with or without PA treatment, n = 2 biological samples per group. **e**, Transcriptional levels of *CIDEA* and *CIDEA* of indicated groups, n = 3 biological samples per group (mean ± SD).  $**P_{CIDEA}(Ctrl+Vec+CT$  vs  $Ctrl+Vec+PA)$  = 0.0041,  $*P_{CIDEA}(Ctrl+Vec+PA$  vs  $UTX$  KO+Vec+PA) = 0.0495,  $***P_{CIDEA}(UTX$  KO+Vec+PA vs  $UTX$  KO+UTX

$WT+PA) < 0.0001$ ;  $*P_{CIDEA} (Ctrl+Vec+CT \text{ vs } Ctrl+Vec+PA) = 0.0163$ ,  $*P_{CIDEA} (Ctrl+Vec+PA \text{ vs } UTX \text{ KO}+Vec+PA) = 0.0293$ ,  $**P_{CIDEA} (UTX \text{ KO}+Vec+PA \text{ vs } UTX \text{ KO}+UTX \text{ WT}+PA) = 0.0036$  (one-way ANOVA). **f**, Luciferase reporter assays that examine the effects of UTX on *CIDEA* and *CIDEA* promoters in HK-2 cells, n =3 biological samples per group (mean  $\pm$  SD).  $*P_{CIDEA} (Vec+CT \text{ vs } UTX+CT) = 0.0495$ ,  $*P_{CIDEA} (Vec+CT \text{ vs } Vec+PA) = 0.0379$ ,  $***P_{CIDEA} (Vec+PA \text{ vs } UTX+PA) = 0.0004$ ;  $*P_{CIDEA} (Vec+CT \text{ vs } UTX+CT) = 0.0134$ ,  $**P_{CIDEA} (Vec+CT \text{ vs } Vec+PA) = 0.0015$ ,  $***P_{CIDEA} (Vec+PA \text{ vs } UTX+PA) = 0.0002$  (one-way ANOVA). **g**, Representative Western blot analysis of PHGDH level in PHGDH knockout HK-2 cells. **h**, Representative Western blot analysis of UTX and PHGDH levels in UTX knockout (UTX KO), UTX/PHGDH double knockout (DKO) HK-2 cells. a-f, at least 3 independent experiments were performed and similar results were obtained. Source data are provided in the Source Data file.

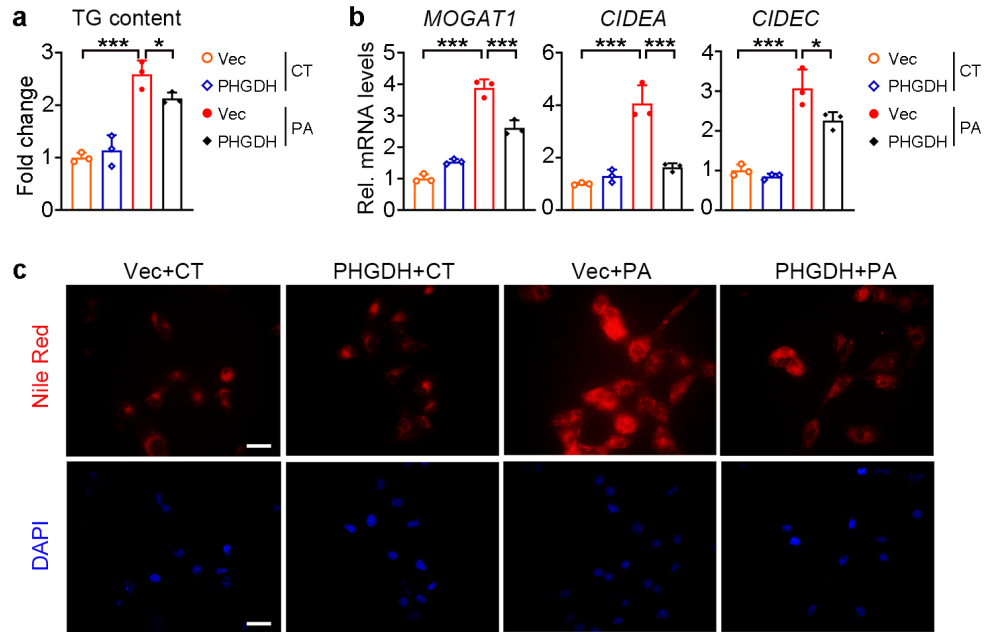

**Supplementary Fig. 11 PHGDH overexpression inhibited lipid accumulation in palmitic acid stressed HK-2 cells. a-c, TG level (a), transcriptional levels of TG synthesis/storage related genes (b) and Nile Red staining (c) in PHGDH overexpressing HK-2 cells, n =3 biological samples per group (mean  $\pm$  SD); at least 3 independent experiments were performed and similar results were obtained.  $***P_{TG} (Vec+CT \text{ vs } Vec+PA) < 0.0001$ ,  $*P_{TG} (Vec+PA \text{ vs } PHGDH+PA) = 0.0495$ ;  $***P_{MOGAT1} (Vec+CT \text{ vs } Vec+PA) < 0.0001$ ,  $***P_{MOGAT1} (Vec+PA \text{ vs } PHGDH+PA) = 0.0001$ ;  $***P_{CIDEA} (Vec+CT \text{ vs } Vec+PA) < 0.0001$ ,  $***P_{CIDEA} (Vec+PA \text{ vs } PHGDH+PA) = 0.0001$ ;  $***P_{CIDEA} (Vec+CT \text{ vs } Vec+PA) < 0.0001$ ,  $*P_{CIDEA} (Vec+PA \text{ vs } PHGDH+PA) = 0.016$  (one-way ANOVA). Scale bar, 50  $\mu$ m. Source data are provided in the Source Data file.**

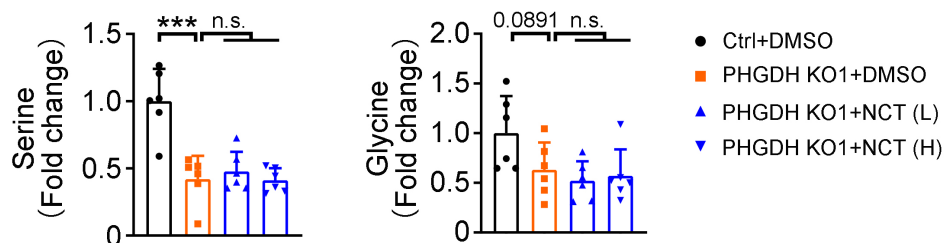

**Supplementary Fig. 12 NCT-503 treatment showed no further effects on serine and glycine levels in PHGDH KO HK-2 cells.** Serine (left) and glycine (right) levels in the PHGDH knockout or NCT-503 treated PHGDH knockout cells, n = 6 biological samples per group (mean  $\pm$  SD); at least 3 independent experiments were performed and similar results were obtained.  $***P_{serine} (Ctrl+DMSO \text{ vs } PHGDH \text{ KO1}+DMSO) < 0.0001$  (one-way ANOVA). Source data are provided in the Source Data file.

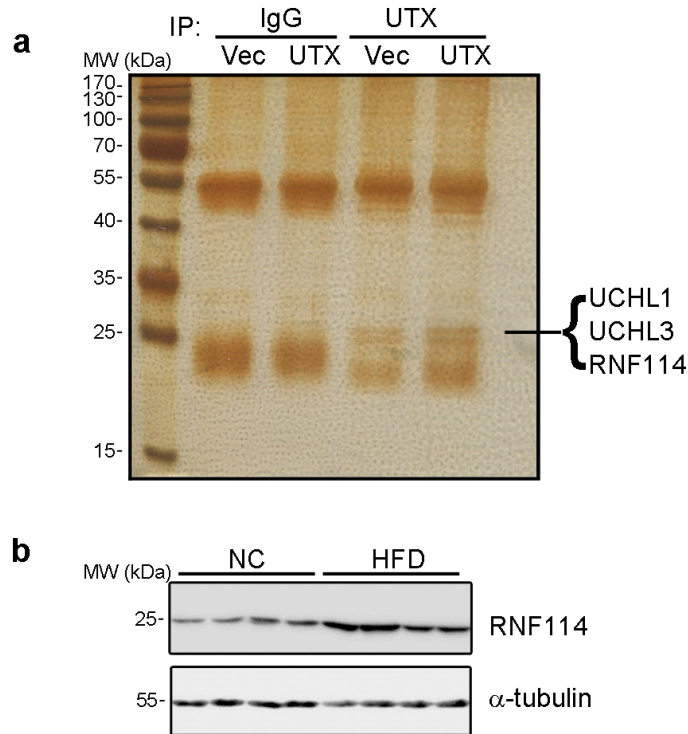

**Supplementary Fig. 13 RNF114 was a possible binding partner of UTX that was increased upon HFD stress in the kidney.** **a**, Silver staining and mass-spectrometry results of immunoprecipitation suggested possible binding partners of UTX. The SDS-PAGE and staining were repeated for three times. **b**, Representative Western blots of RNF114 in the kidney of WT mice under NC and HFD conditions, n = 6 independent animals. Source data are provided in the Source Data file.

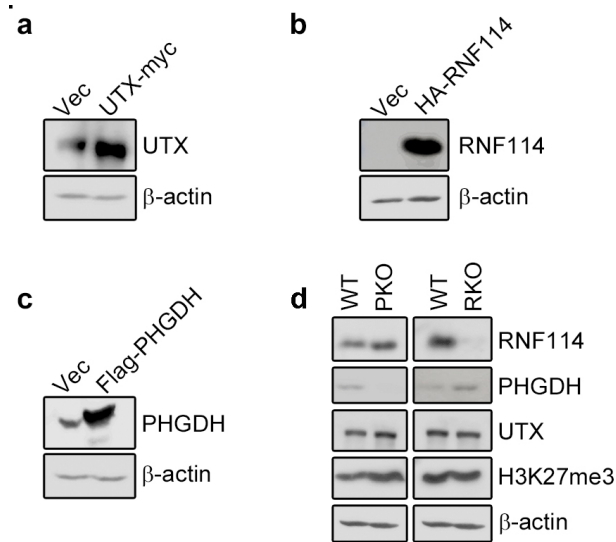

**Supplementary Fig. 14 Transient overexpression of UTX, RNF114, and PHGDH in cultured cells.** **a-c**, Western blot analysis of UTX, RNF114, PHGDH and  $\beta$ -actin levels in HEK293T cells when overexpressed UTX-myc (**a**), HA-RNF114 (**b**), or Flag-PHGDH (**c**). **d**, Western blot analysis of RNF114, PHGDH, UTX, H3K27me3, and  $\beta$ -actin levels in indicated HK-2 cells. PKO, PHGDH knockout HK-2 cells (PHGDH KO1); RKO, RNF114 knockout HK-2 cells. a-c, at least 2 independent experiments were performed to verify the expression efficiency of plasmids; d, 3 independent experiments were performed and similar results were obtained. Source data are provided in the Source Data file.

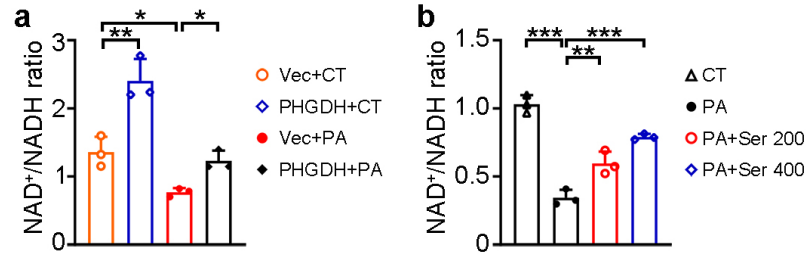

**Supplementary Fig. 15 Overexpression of PHGDH or serine treatment increased NAD<sup>+</sup>/NADH ratio in HK-2 cells.** NAD<sup>+</sup>/NADH ratio in the PHGDH overexpression (**a**) or serine-treated (**b**) HK-2 cells, n = 3 biological samples per group (mean ± SD); at least 3 independent experiments were performed and similar results were obtained. (a)  $^{**}P_{NAD^+/NADH} (Vec+CT vs PHGDH+CT) = 0.0014$ ,  $^*P_{NAD^+/NADH} (Vec+CT vs Vec+PA) = 0.0378$ ,  $^*P_{NAD^+/NADH} (Vec+PA vs PHGDH+PA) = 0.0208$ ; (b)  $^{***}P_{NAD^+/NADH} (CT vs PA) < 0.0001$ ,  $^{**}P_{NAD^+/NADH} (PA vs PA+Ser200) = 0.0031$ ,  $^{***}P_{NAD^+/NADH} (PA vs PA+Ser400) < 0.0001$  (one-way ANOVA). Source data are provided in the Source Data file.

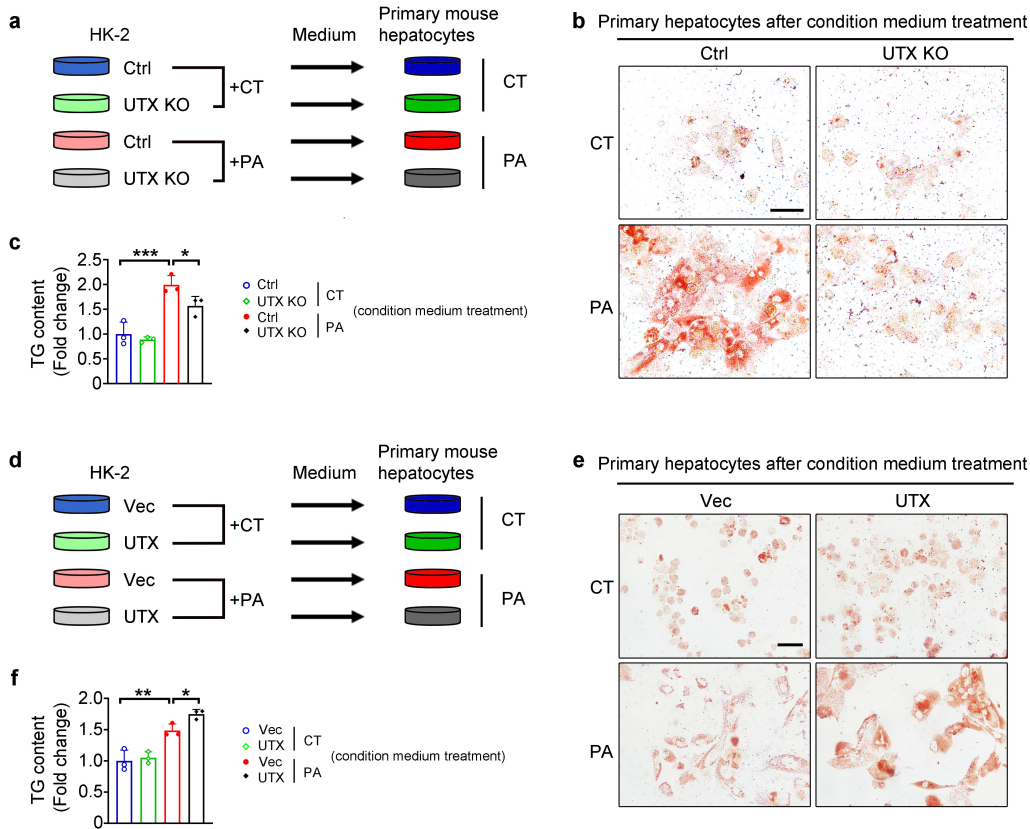

**Supplementary Fig. 16 Conditional medium from UTX knockout or overexpressed HK-2 cells altered lipid accumulation in palmitic acid treated primary mouse hepatocytes.** **a-c**, Experiment design (**a**), Oil Red O staining (**b**) and TG concentration (**c**) of primary mouse hepatocytes treated by the medium from the indicated groups. Scale bar, 100  $\mu$ m,  $n = 3$  biological samples per group (mean  $\pm$  SD); at least 3 independent experiments were performed and similar results were obtained. Images were taken under a Sunny RX50 microscope.  $***P_{TG} (Ctrl+CT vs Ctrl+PA) = 0.0004$ ,  $*P_{TG} (Ctrl+PA vs UTX KO+PA) = 0.0495$  (one-way ANOVA). **d-f**, Experiment design (**d**), Oil Red O staining (**e**) and TG concentration (**f**) of primary mouse hepatocytes treated by the medium from the indicated groups. Scale bar, 50  $\mu$ m,  $n = 3$  biological samples per group (mean  $\pm$  SD); at least 3 independent experiments were performed and similar results were obtained. Images were taken under an Olympus BX60 microscope.  $**P_{TG} (Vec+CT vs Vec+PA) = 0.0025$ ,  $***P_{TG} (Vec+PA vs UTX +PA) = 0.0282$  (one-way ANOVA). Source data are provided in the Source Data file.



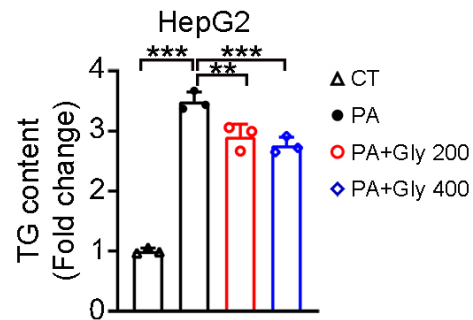

**Supplementary Fig. 17 Glycine treatment downregulated triglyceride level in palmitic acid treated HepG2 cells.**  $n = 3$  biological samples per group (mean  $\pm$  SD); at least 3 independent experiments were performed and similar results were obtained.  $***P_{TG(CT\ vs\ PA)} < 0.0001$ ,  $**P_{TG(PA\ vs\ PA+Gly200)} = 0.0035$ ;  $***P_{TG(PA\ vs\ PA+Gly400)} = 0.0009$  (one-way ANOVA). Source data are provided in the Source Data file.

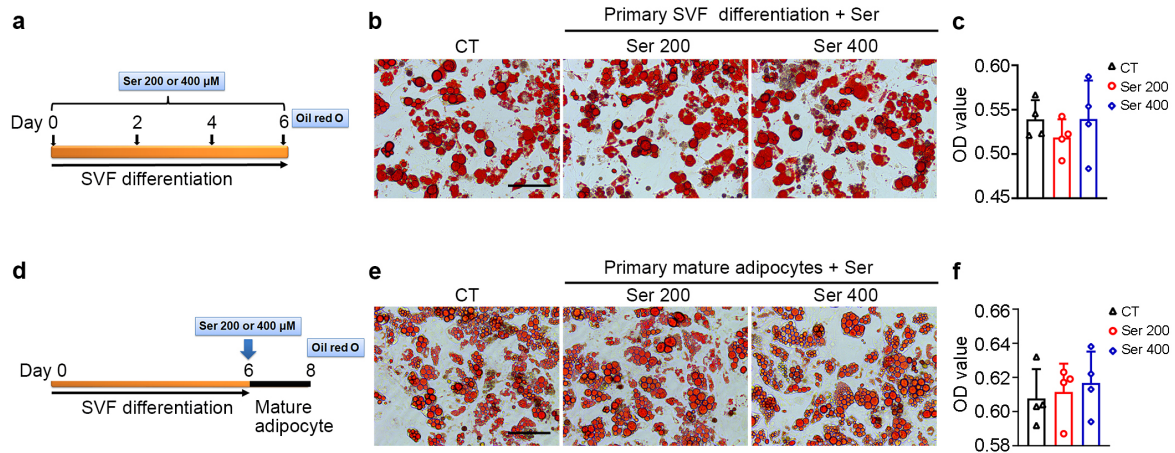

**Supplementary Fig. 18 Serine treatment did not affect adipocyte differentiation or lipid accumulation in mouse primary adipocytes.** **a-c**, Experimental design (**a**), Oil Red O staining (**b**) and lipid accumulation (**c**) for serine treated primary SVF cells from adipocyte differentiation Day 0.  $n = 4$  biological samples per group (mean  $\pm$  SD); at least 3 independent experiments were performed with similar results. **d-f**, Experimental design (**d**), Oil Red O staining (**e**) and lipid accumulation (**f**) for serine treated matured adipocytes differentiated from primary SVF cells.  $n = 4$  biological samples per group (mean  $\pm$  SD); at least 3 independent experiments were performed with similar results. Scale bar, 50  $\mu\text{m}$ . Source data are provided in the Source Data file.

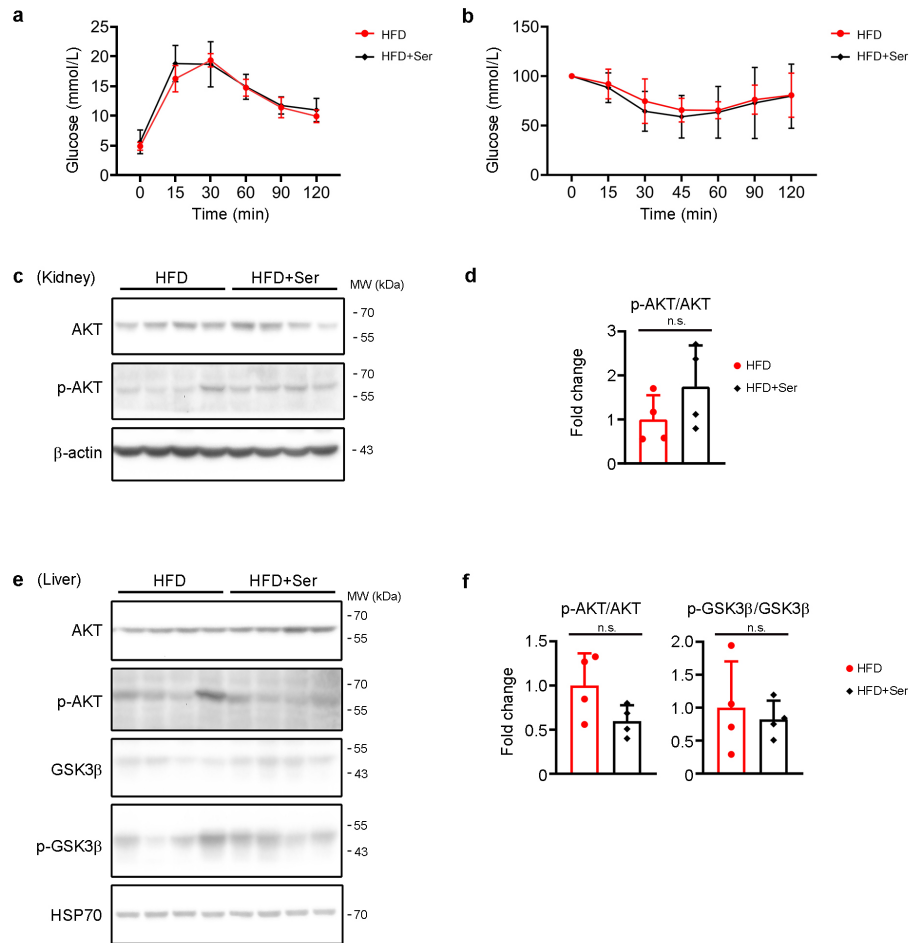

**Supplementary Fig. 19 Serine treatment showed no obvious effect on insulin signaling pathway in the liver and kidney of HFD-fed mice.** **a-b**, Glucose tolerance test (GTT) and insulin tolerance test (ITT) results of indicated groups. **a**,  $n = 6$ , 5 independent animals for HFD or HFD+Ser group, respectively; **b**,  $n = 4$  independent animals (mean  $\pm$  SD, unpaired, two-tailed t-test). **c-d**, Representative Western blots with densitometric quantitative results of p-AKT/AKT in the kidney of serine treated HFD-fed mice.  $n = 4$  independent animals (mean  $\pm$  SD, unpaired, two-tailed t-test). **e-f**, Representative Western blots with densitometric quantitative results of p-AKT/AKT, p-GSK3 $\beta$ /GSK3 $\beta$  in the liver of serine treated HFD-fed mice.  $n = 4$  independent animals (mean  $\pm$  SD, unpaired, two-tailed t-test). Source data are provided in the Source Data file.

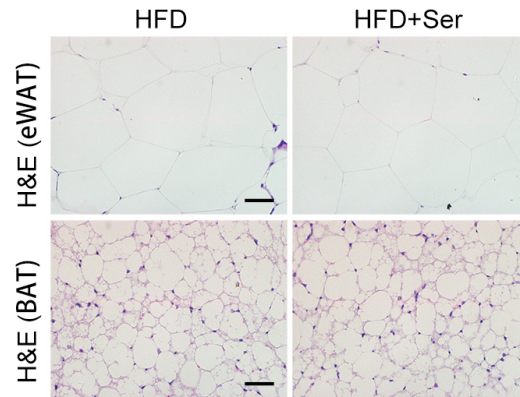

**Supplementary Fig. 20 Serine treatment showed no obvious effect on adipocyte hypertrophy under HFD stress.** Representative H&E staining in the adipose tissues of HFD-fed mice with serine treatment. n = 4 independent animals. Scale bar, 50  $\mu$ m.

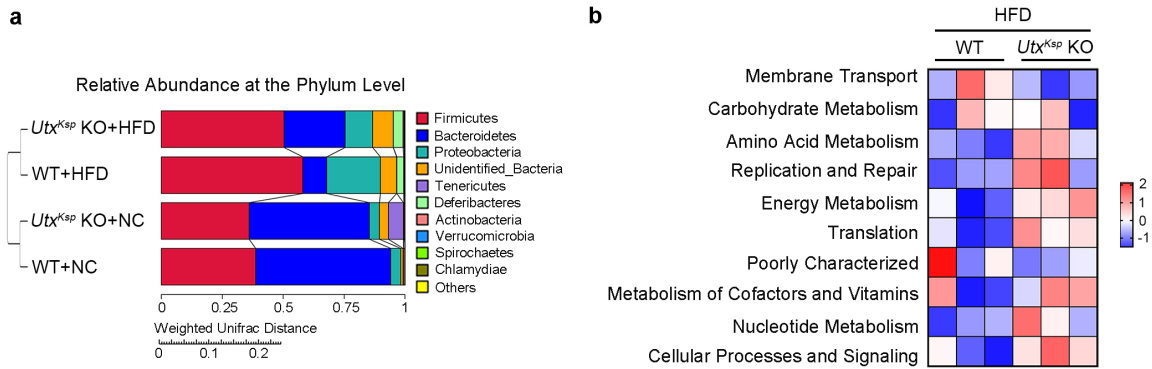

**Supplementary Fig. 21 Fecal metagenomic analysis of *Utx<sup>Ksp</sup>* KO mouse under HFD stress.** **a**, Relative phylum abundance in fecal samples between groups. The 10 most abundant taxa are shown at the phylum level. **b**, PICRUSt prediction of functional profiling of the microbial communities based on the 16S rRNA gene sequences. Each biological sample were obtained from 2-3 mice, and each group contains 3 biological samples. WT+NC, wild-type mice fed with normal chow; *Utx<sup>Ksp</sup>* KO+NC, *Utx<sup>Ksp</sup>* KO mice fed with normal chow; WT+HFD, wild-type mice fed with high fat diet; *Utx<sup>Ksp</sup>* KO+HFD, *Utx<sup>Ksp</sup>* KO mice fed with high fat diet.

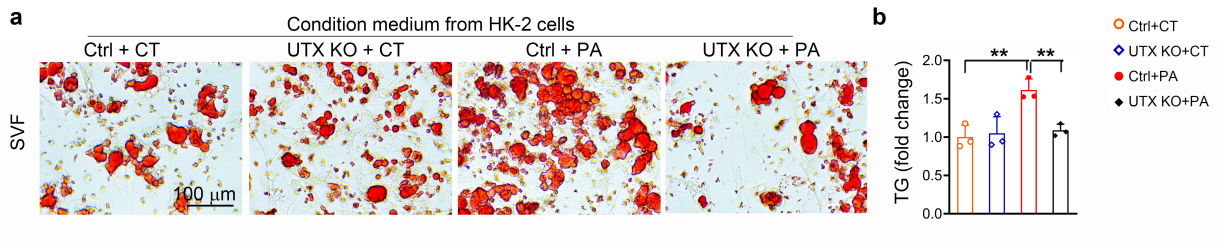

**Supplementary Fig. 22 Conditional medium from UTX knockout HK-2 cells altered lipid accumulation in palmitic acid treated primary mouse SVF cells.** Representative images of Oil Red O staining (**a**) and TG concentration (**b**) of primary mouse SVF cells treated by the medium from indicated groups,  $n = 3$  biological samples per group (mean  $\pm$  SD); at least 3 independent experiments were performed and similar results were obtained.  $**P_{TG (Ctrl+CT vs Ctrl+PA)} = 0.0037$ ,  $**P_{TG (Ctrl+PA vs UTX KO+PA)} = 0.0089$  (one-way ANOVA). Scale bar, 100  $\mu$ m. Source data are provided in the Source Data file.

**Supplementary Table 1.** Characteristics of subjects with obesity and the controls whose renal sections used for immunohistochemical study.

| Group   | Patient ID | Age (year) | Gender | BMI (kg/m <sup>2</sup> ) | CREA (μmol/L) | eGFR (mL/min/1.73m <sup>2</sup> ) | BUN (mmol/L) | Alb (g/L) | Globin (g/L) | TG (mmol/L) | TC (mmol/L) | Proteinure (g/24 h) | Blood pressure (mmHg) | Smoking (cigarette/day) | Alcohol (mL/day) | Diabetes history (year) |
|---------|------------|------------|--------|--------------------------|---------------|-----------------------------------|--------------|-----------|--------------|-------------|-------------|---------------------|-----------------------|-------------------------|------------------|-------------------------|
| obesity | 1          | 53         | Female | 30                       | 55.5          | 105.4                             | 4.7          | 39.7      | N.A.         | 1.2         | 4.2         | 0.6                 | 119/79                | None                    | None             | None                    |
|         | 2          | 22         | Male   | 31                       | 63.2          | 146.2                             | 3.3          | 45        | 24           | 1.7         | 4.6         | N.A.                | 119/76                | 15                      | None             | None                    |
|         | 3          | 30         | Male   | 30                       | 53.2          | 167.5                             | 2.6          | 42.4      | 18.2         | 1.8         | 2.61        | 0.4                 | N.A.                  | None                    | None             | None                    |
|         | 4          | 44         | Female | 29                       | 54.5          | 111.8                             | 4.1          | 43.1      | 23.8         | 2.2         | N.A.        | N.A.                | 180/101               | None                    | None             | None                    |
|         | 5          | 29         | Male   | 29                       | 67.4          | 128.4                             | 4.2          | 52.7      | 23.4         | 5.1         | 5.1         | N.A.                | 142/104               | None                    | None             | None                    |
| control | 1          | 55         | Female | 22                       | 92            | 58.4                              | 3.9          | 40.5      | 26.1         | 1.0         | 3.76        | 1.4                 | 130/80                | None                    | None             | None                    |
|         | 2          | 49         | Female | 23                       | 52.9          | 113.2                             | 4.5          | 19.8      | 19.1         | 3.7         | 9.7         | 0.5                 | 120/85                | None                    | None             | None                    |
|         | 3          | 38         | Male   | 23                       | 71.6          | 113.3                             | 5.2          | 43        | 24.7         | 1.8         | 5.2         | 0.3                 | 131/95                | None                    | None             | None                    |
|         | 4          | 30         | Female | 19                       | 55            | 119.6                             | 4.8          | 16.2      | 18.9         | 1.6         | 10.6        | N.A.                | 129/73                | None                    | None             | None                    |

Control: normal weight, BMI < 23 kg/m<sup>2</sup>; obesity: BMI ≥ 27.5 kg/m<sup>2</sup> (according to Hsu *et al.*, *Diabetes Care* 38, 150-158, 2015).

Abbreviations: N.A., not available. BMI, body mass index; CREA, serum creatinine; eGFR, estimated glomerular filtration rate; BUN, blood urea nitrogen; Alb, albumin; TG, triglyceride; TC, total cholesterol. Drug usage history unavailable. Source data are provided in the Source Data file.

**Supplementary Table 2.** Tissue weights of WT and  $Utx^{Ksp}$  KO mice fed with NC or HFD.

|                   | WT+NC       | $Utx^{Ksp}$ KO+NC | WT+HFD                     | $Utx^{Ksp}$ KO+HFD         |
|-------------------|-------------|-------------------|----------------------------|----------------------------|
| Kidney weight (g) | 0.20 ± 0.02 | 0.20 ± 0.03       | 0.22 ± 0.03                | 0.21 ± 0.02                |
| Liver weight (g)  | 1.48 ± 0.07 | 1.35 ± 0.06       | 1.74 ± 0.43                | 1.21 ± 0.22 <sup>#</sup>   |
| eWAT weight (g)   | 0.33 ± 0.06 | 0.60 ± 0.12       | 2.26 ± 0.32 <sup>***</sup> | 1.88 ± 0.72                |
| iWAT weight (g)   | 0.21 ± 0.03 | 0.37 ± 0.07       | 2.12 ± 0.46 <sup>***</sup> | 1.14 ± 0.54 <sup>###</sup> |
| BAT weight (g)    | 0.12 ± 0.01 | 0.16 ± 0.03       | 0.57 ± 0.10 <sup>***</sup> | 0.33 ± 0.12 <sup>###</sup> |

Data are presented as mean ± SD. Statistical significance was determined by one-way ANOVA. NC, normal chow; HFD, high fat diet. Source data are provided in the Source Data file. <sup>\*\*\*</sup> $P_{eWAT(WT+NC vs WT+HFD)} < 0.0001$ , <sup>\*\*\*</sup> $P_{iWAT(WT+NC vs WT+HFD)} < 0.0001$ , <sup>\*\*\*</sup> $P_{BAT(WT+NC vs WT+HFD)} < 0.0001$ ; <sup>#</sup> $P_{Liver(WT+HFD vs Utx^{Ksp} KO +HFD)} = 0.0112$ , <sup>###</sup> $P_{iWAT(WT+HFD vs Utx^{Ksp} KO +HFD)} = 0.0005$ ; <sup>###</sup> $P_{BAT(WT+HFD vs Utx^{Ksp} KO +HFD)} = 0.0003$ .



**Supplementary Table 3.** Tissue weights of WT and  $Utx^{Pax2}$  KO mice fed with NC or HFD.

|                   | WT+NC       | $Utx^{Pax2}$ KO+NC | WT+HFD         | $Utx^{Pax2}$ KO+HFD |
|-------------------|-------------|--------------------|----------------|---------------------|
| Kidney weight (g) | 0.21 ± 0.02 | 0.15 ± 0.02        | 0.25 ± 0.02**  | 0.15 ± 0.01###      |
| Liver weight (g)  | 1.37 ± 0.10 | 1.45 ± 0.32        | 1.99 ± 0.54*   | 1.22 ± 0.22##       |
| iWAT weight (g)   | 0.27 ± 0.08 | 0.15 ± 0.04        | 1.63 ± 0.54*** | 1.37 ± 0.48         |
| eWAT weight (g)   | 0.41 ± 0.13 | 0.38 ± 0.09        | 1.59 ± 0.30*** | 0.86 ± 0.19###      |
| BAT weight (g)    | 0.16 ± 0.02 | 0.14 ± 0.04        | 0.51 ± 0.10*** | 0.26 ± 0.09###      |

Data are presented as mean ± SD. Statistical significance was determined by one-way ANOVA.

NC, normal chow; HFD, high fat diet. Source data are provided in the Source Data file. \*\* $P_{Kidney}$

(WT+NC vs WT+HFD) = 0.0040, \* $P_{Liver}$  (WT+NC vs WT+HFD) = 0.0237, \*\*\* $P_{iWAT}$  (WT+NC vs WT+HFD) < 0.0001,

\*\*\* $P_{eWAT}$  (WT+NC vs WT+HFD) < 0.0001, \*\*\* $P_{BAT}$  (WT+NC vs WT+HFD) < 0.0001; ### $P_{Kidney}$  (WT+HFD vs  $Utx^{Pax2}$  KO

+HFD) < 0.0001, ## $P_{Liver}$  (WT+HFD vs  $Utx^{Pax2}$  KO +HFD) = 0.0049, ### $P_{eWAT}$  (WT+HFD vs  $Utx^{Pax2}$  KO +HFD) <

0.0001, ### $P_{BAT}$  (WT+HFD vs  $Utx^{Pax2}$  KO +HFD) = 0.0002.

**Supplementary Table 4.** Characteristics of subjects with diabetic kidney disease and the controls whose renal sections used for immunohistochemical study.

| Group   | Patient ID | Age (year) | Gender | Blood glucose (mmol/L) | HbA1c | eGFR (mL/min/1.73m <sup>2</sup> ) | CREA (μmol/L) | BUN (mmol/L) | Alb (g/L) | Globin (g/L) | TG (mmol/L) | TC (mmol/L) | Proteinure (g/24 h) | Blood pressure (mmHg) | Smoking (cigarette/day) | Alcohol (mL/day) | Diabetes history (year) |
|---------|------------|------------|--------|------------------------|-------|-----------------------------------|---------------|--------------|-----------|--------------|-------------|-------------|---------------------|-----------------------|-------------------------|------------------|-------------------------|
| DKD     | 1          | 67         | Male   | 7.6                    | N.A.  | 35.2                              | 178.7         | N.A.         | N.A.      | N.A.         | N.A.        | N.A.        | 7.2                 | 140/70                | None                    | None             | 12                      |
|         | 2          | 60         | Female | 8.9                    | N.A.  | 93.8                              | 60.1          | N.A.         | N.A.      | N.A.         | N.A.        | N.A.        | 5.7                 | 180/100               | None                    | None             | 5                       |
|         | 3          | 50         | Male   | 5.9                    | 6.1%  | 63.9                              | 114           | 7.5          | 26.5      | 26.1         | 2.2         | 4.8         | 9.9                 | 151/85                | None                    | None             | 16                      |
|         | 4          | 58         | Female | 9.6                    | N.A.  | 30.7                              | 159.2         | N.A.         | N.A.      | N.A.         | N.A.        | N.A.        | 1.9                 | 160/90                | None                    | None             | 7                       |
|         | 5          | 48         | Female | 10.9                   | N.A.  | 99.1                              | 59.6          | N.A.         | N.A.      | N.A.         | N.A.        | N.A.        | 3.4                 | 160/100               | None                    | None             | 3                       |
|         | 6          | 57         | Female | 7.2                    | 7.5%  | 3.7                               | 926           | 5.9          | 35.5      | 30.3         | 3.5         | 8.1         | 2.6                 | 139/81                | None                    | None             | 7                       |
|         | 7          | 73         | Male   | N.A.                   | 6.6%  | 59.2                              | 112.2         | N.A.         | 31.8      | N.A.         | N.A.        | N.A.        | 3.9                 | 160/90                | None                    | None             | 15                      |
|         | 8          | 51         | Male   | N.A.                   | 11%   | 39.8                              | 165.6         | 7.01         | 122.7     | 75.5         | 1.8         | 8.8         | N.A.                | 130/89                | None                    | None             | 10                      |
|         | 9          | 27         | Female | N.A.                   | 7.4%  | 19.8                              | 266.3         | 16.23        | 26.8      | 27.5         | 1.2         | 5.9         | 3.6                 | N.A.                  | None                    | None             | N.A.                    |
| control | 1          | 38         | Male   | 4.7                    | N.A.  | 107.2                             | 80            | 4.8          | 29.2      | 18           | 0.9         | 3.5         | 2.3                 | 109/65                | None                    | None             | None                    |
|         | 2          | 63         | Female | N.A.                   | N.A.  | 92.4                              | 60.4          | 4.9          | 19.4      | 20.1         | 4.5         | 7.8         | 6.7                 | 149/83                | None                    | None             | None                    |
|         | 3          | 55         | Male   | 6.1                    | N.A.  | 123.2                             | 62.4          | N.A.         | N.A.      | N.A.         | N.A.        | N.A.        | 2.8                 | 130/80                | None                    | None             | None                    |
|         | 4          | 26         | Male   | 5.1                    | N.A.  | 108.3                             | 79.6          | N.A.         | N.A.      | N.A.         | N.A.        | N.A.        | 11.4                | 124/80                | 10-15                   | 50               | None                    |
|         | 5          | 42         | Female | 5.8                    | N.A.  | 144.2                             | 44.1          | N.A.         | N.A.      | N.A.         | N.A.        | N.A.        | 5.0                 | 110/70                | None                    | None             | None                    |
|         | 6          | 59         | Female | 6.4                    | N.A.  | 55.5                              | 95            | N.A.         | N.A.      | N.A.         | N.A.        | N.A.        | 3.0                 | 120/76                | None                    | None             | None                    |
|         | 7          | 35         | Male   | N.A.                   | 5.5%  | 115.1                             | 71.7          | 3.6          | 22.1      | 17.7         | 2.6         | 7.8         | 7.5                 | 115/82                | None                    | None             | None                    |
|         | 8          | 58         | Male   | 4.9                    | N.A.  | 76.4                              | 80.7          | 6            | 29.9      | 25.2         | 1.6         | 5.0         | N.A.                | N.A.                  | None                    | None             | None                    |
|         | 9          | 46         | Female | 5.4                    | N.A.  | 139                               | 44.8          | 2.7          | 31.1      | 24.9         | 1.5         | 4.3         | 0.5                 | 134/94                | None                    | None             | None                    |

DKD, diabetic kidney disease; control, membrane nephropathy, N.A., not available. Hb1Ac, hemoglobin A1c; eGFR, estimated glomerular

filtration rate; CREA, serum creatinine; BUN, blood urea nitrogen; Alb, albumin; TC, total cholesterol; TG, triglyceride. Drug usage history unavailable. Source data are provided in the Source Data file.

**Supplementary Table 5.** Characteristics of clinical serum samples used in this study

| <b>Group</b>                                      | <b>Age (year)</b> | <b>Gender (M/F)</b> | <b>Body weight (kg)</b> | <b>BMI (kg/m<sup>2</sup>)</b> | <b>CREA (μmol/L)</b> | <b>BUN (mmol/L)</b> | <b>Alb (g/L)</b> | <b>Globin (g/L)</b> | <b>TG (mmol/L)</b> | <b>TC (mmol/L)</b> |
|---------------------------------------------------|-------------------|---------------------|-------------------------|-------------------------------|----------------------|---------------------|------------------|---------------------|--------------------|--------------------|
| <b>CT (n = 39)</b>                                | 41.2 ± 16.6       | 19/20               | 60.4 ± 7.1              | 21.6 ± 1.6                    | 67.3 ± 12.8          | 5.0 ± 1.6           | 41.9 ± 4.1       | 28.4 ± 3.6          | 1.3 ± 0.6          | 4.7 ± 1.0          |
| <b>Overweight (n = 23)</b>                        | 51.9 ± 18.7       | 14/9                | 74.5 ± 6.3              | 26.2 ± 0.7                    | 102.9 ± 96.8         | 6.7 ± 4.5           | 39.6 ± 4.5       | 25.6 ± 3.1          | 1.7 ± 1.0          | 4.1 ± 0.8          |
| <b>Obesity (n = 24)</b>                           | 47.0 ± 15.3       | 15/9                | 86.6 ± 13.4             | 31.0 ± 2.6                    | 68.8 ± 16.5          | 4.9 ± 1.4           | 40.1 ± 3.4       | 26.3 ± 4.0          | 2.3 ± 1.7          | 4.5 ± 1.2          |
| <b>Obesity-related renal dysfunction (n = 12)</b> | 58.3 ± 9.6        | 11/1                | 80.7 ± 6.2              | 29.1 ± 1.5                    | 448.3 ± 367.3        | 18.0 ± 10.8         | 37.6 ± 2.6       | 27.7 ± 5.5          | 2.1 ± 1.2          | 3.6 ± 0.9          |

CT: individuals with normal body weight (BMI < 23 kg/m<sup>2</sup>); overweight: subjects whose  $23 \leq \text{BMI} < 27.5 \text{ kg/m}^2$ ; obesity: subjects whose BMI  $\geq 27.5 \text{ kg/m}^2$  without renal dysfunction; obesity related renal dysfunction: subjects whose BMI  $\geq 27.5 \text{ kg/m}^2$  with renal dysfunction.

Abbreviations: M, male; F, female; BMI, body mass index; CREA, serum creatinine; BUN, blood urea nitrogen; Alb, albumin; TG, triglyceride; TC, total cholesterol. Some subjects with no available albumin and globin levels. Drug usage history unavailable. Source data are provided in the Source Data file.

**Supplementary Table 6.** Tissue weights of HFD-fed C57BL/6 mice with/without serine treatment.

|                   | HFD         | HFD + Ser    |
|-------------------|-------------|--------------|
| Kidney weight (g) | 0.22 ± 0.04 | 0.20 ± 0.02  |
| Liver weight (g)  | 2.09 ± 0.40 | 1.57 ± 0.37* |
| eWAT weight (g)   | 2.33 ± 0.53 | 2.31 ± 0.74  |
| iWAT weight (g)   | 2.34 ± 0.28 | 1.88 ± 0.72  |
| BAT weight (g)    | 0.47 ± 0.08 | 0.43 ± 0.14  |

Data are presented as mean ± SD. Statistical significance was determined by two-tailed Student's *t* test. Source data are provided in the Source Data file. \* $P_{Liver (HFD vs HFD+Ser)} = 0.0261$ .

**Supplementary Table 7.** Primer sequences used for genotyping.

---

|                 |                         |                           |
|-----------------|-------------------------|---------------------------|
| <i>Utx-flox</i> | GGTCACTTCAACCTCTTATTGGA | ACGAGTGATTGGTCTAATTTGG    |
| <i>Ksp-Cre</i>  | GCAGATCTGGCTCTCCAAAG    | AGGCAAATTTTGGTGTACGG      |
| <i>Pax2-Cre</i> | TCAAATGGCTCTCCTCAAGC    | AGCTGGCCCAAATGTTGCTG      |
| <i>Alb-Cre</i>  | GAACCTGATGGACATG TTCAGG | AGTGCGTTCGAACGCTAGAGCCTGT |
| <i>Adi-Cre</i>  | ACG GACAGAAGCATT TCCA   | GGATGTGCCATGTGAGTCTG      |

---

**Supplementary Table 8.** Antibodies used in the present study.

| <b>Antibody</b> | <b>Catalog number</b> | <b>Company</b>            |
|-----------------|-----------------------|---------------------------|
| $\beta$ -actin  | A5316                 | Sigma Aldrich             |
| UTX             | 33510 (for WB and IF) | Cell Signaling Technology |
| UTX             | ab36938 (for IHC)     | Abcam Biochemicals        |
| FLAG            | F1804                 | Sigma Aldrich             |
| RNF114          | HPA021184             | Sigma Aldrich             |
| PHGDH           | 14719-1-AP            | Proteintech               |
| HA              | H9658                 | Sigma Aldrich             |
| H3K27me3        | PTM-622 (for WB)      | PTM Biolabs               |
| H3K27me3        | ab6002 (for ChIP)     | Abcam Biochemicals        |
| H3              | 9715                  | Cell Signaling Technology |
| AKT             | 4691                  | Cell Signaling Technology |
| p-AKT           | 9271s                 | Cell Signaling Technology |
| SGLT2           | 24654-1-AP            | Proteintech               |
| LDLR            | A14996                | ABclonal                  |
| FXR             | Sc-25309              | Santa Cruz                |
| PPAR $\alpha$   | Sc-9000               | Santa Cruz                |
| SREBP1          | Sc-367                | Santa Cruz                |
| p-GSK 3 $\beta$ | 9323s                 | Cell Signaling Technology |
| GSK 3 $\beta$   | 9832S                 | Cell Signaling Technology |
| $\alpha$ -SMA   | A2547                 | Sigma Aldrich             |
| WT1             | Sc-393498             | Santa Cruz                |

**Supplementary Table 9.** Primers for plasmids constructed in the study.

| <b>Primer name</b> | <b>Sequence (5'-3')</b>                                                                    |
|--------------------|--------------------------------------------------------------------------------------------|
| FLAG-PHGDH WT      | Forward: GCGGTCGACCATGGCTTTTGCAAATCTGCGG<br>Reverse: ACGAGCGGCCGCGAAGTGGAACTGGAAGGCTTC     |
| PHGDH K146R        | Forward: GAGCTGAATGGAAGGACCCTGGGAATT<br>Reverse: AATCCCAGGGTCCTTCCATTCAGCTC                |
| PHGDH K289R        | Forward: GGTGCCAGCACCAGGGAGGCTCAGAGC<br>Reverse: GCTCTGAGCCTCCCTGGTGCTGGCACC               |
| PHGDH K310R        | Forward: CATGGTGAAGGGGAGATCTCTCACGGGGG<br>Reverse: CCCCCGTGAGAGATCTCCCCTCACCATG            |
| PHGDH K330R        | Forward: CTCTCCACACACCAGGCCTTGGATTGGTCTG<br>Reverse: GACCAATCCAAGGCCTGGTGTGTGGAGAGAAG      |
| PHGDH K364R        | Forward: CAGGGAACATCCCTGAGGAATGCT GGGAAGT<br>Reverse: CAGTTCCCAGCATTCTCAGGGATGTT CCCTG     |
| PHGDH K384R        | Forward: AAAGAGGCTTCCAGGCAGGCGGATGTG<br>Reverse: CACATCCGCCTGCCTGGAAGCCTCTTT               |
| HA-RNF114          | Forward: GCGGTCGACCATGGCGGCGCAACAGCGGGAC<br>Reverse: ACGAGCGGCCGCTCACTGGTTCGATGATGGAGCGCTG |
| pGL3-basic-CIDEA   | Forward: ATTACGCGTCCACCCACCCCATGTCCAC<br>Reverse: ATTAGATCTGCGCCAGCTCCCGTTGTGATT           |
| pGL3-basic-CIDEC   | Forward: ATTACGCGTGGCGTGAGCCACGGCACCCAG<br>Reverse: ATTAGATCTCCTGAATCAGAATCTGCACTTGA       |



**Supplementary Table 10.** qPCR primers used in the present study.

| <b>Gene</b>        | <b>Forward primer</b>     | <b>Reverse primer</b>   |
|--------------------|---------------------------|-------------------------|
| M/H/R <i>Rn18s</i> | TTAAGAGGGACGGCCGGGGG      | GCCGGGTGAGGTTTCCCGTG    |
| <i>M Actb</i>      | GCTCTTTTCCAGCCTTCCTT      | CGGATGTCAACGTCACACTT    |
| <i>H ACTB</i>      | TGGACTTCGAGCAAGAGATG      | GAAGGAAGGCTGGAAGAGTG    |
| <i>M Utx</i>       | TGGAGGATCTGATGCAAGTCT     | ATCAAGATGAGGCGGATGGT    |
| <i>H UTX</i>       | GCTGGAACAGCTGGAAAGTC      | GAGTCAACTGTTGGCCCATT    |
| <i>H MOGAT1</i>    | AGTGTTGGGCTGGTTTCAGT      | AACAAATCCTTTCCGCTGGC    |
| <i>H GPAM</i>      | TGAACAGATAGCACTGGGGC      | AAAGCCAGGATCATTGGGGC    |
| <i>H CIDEA</i>     | CTCATCAGGCCCTGACATT       | ATGGTTGGAGACCCGGAAAG    |
| <i>H CIDEA</i>     | TGAGAAACATGGAGTCCAACGC    | TGGGGTAGAGAAGGCTAAGGG   |
| <i>M Mogat1</i>    | CCAGCGCAAAGGGTTTGTT       | CACCAAAGAAAATACTGGAACCA |
| <i>M Cidea</i>     | CTTGGGGGTGGTACCCAGTG      | ATCCACGCAGTTCCACACA     |
| <i>M Cidec</i>     | GCTGAAGGGGCAGAAGTGGA      | GCGCTTGGCCTTGTAGCAGT    |
| <i>M Gpam</i>      | GCCAGCAAGTCCTGCGCTAT      | CCTGCTCGTGTGGGTGATTG    |
| <i>M Phgdh</i>     | AGTGGACCACGAGAATGTCA      | CCTTCACCATGTCCACAAAC    |
| <i>M Scd1</i>      | TTCTCAGAAACACACGCCGA      | AGCTTCTCGGCTTTCAGGTC    |
| <i>M Srebp1</i>    | AAGACAGATGCAGGAGCCAC      | ATGGTCCCTCCACTCACCAG    |
| <i>M Acly</i>      | GGCCAGAGAGCTGGGTTTGA      | CCCGAGCACAGATGATGGTG    |
| <i>M Fasn</i>      | CCTGGCTGCCTACTACATCG      | CACATTTCAAAGGCCACGCA    |
| <i>M Fxr</i>       | GGCTGAATGTATGTATACAGGTTTG | CAGCGTGCTGCTTCACATTT    |
| <i>M Ppara</i>     | TGACGTTTGTGGCTGGTCAA      | CAGATGGGGCTCTCTGTGTC    |
| <i>M Ldlr</i>      | CCAATCGACTCACGGGTTC       | CTCACACCAGTTCACCCCTC    |
| <i>M Cd36</i>      | TTGGCCAAGCTATTGCGACA      | CTGGAGGGGTGATGCAAAGG    |
| <i>M Vldlr</i>     | TCAGTCCCAGGCAGCGTAT       | CTTGATCTTGGCGGGTGT      |
| <i>M Slc27a1</i>   | GGGAGCCTGACACCCCTCTT      | CCCCTGGACACTGGTCCAAC    |
| <i>M Acox1</i>     | GGGAGTGCTACGGGTACATG      | CCGATATCCCAACAGTGATG    |

---

|                |                       |                       |
|----------------|-----------------------|-----------------------|
| M <i>Cpt1a</i> | CCATGATGGACCCCACAACA  | TGGTCAACCTCCATGGCTCA  |
| M <i>Cpt1b</i> | ATCTTGGTGGCATGGCTGGT  | GGGACTGGTTCGATTGCATCC |
| M <i>Glut4</i> | ACTCATTCTTGGACGGTTCC  | TAGCTGTGCCCAGCATAGAC  |
| M <i>Sglt2</i> | CATTGGTGTGGCTTGTGGTC  | AAATGACCGCTGCCGATGTT  |
| M <i>Sglt1</i> | GTCGTCACCGTCTTGGTCAT  | GTAGACTCCAGCACAGACGG  |
| M <i>G6pc</i>  | CAGTGGTCGGAGACTGGTTC  | GTCCAGGACCCACCAATACG  |
| M <i>Pepck</i> | TGAAAGGCCGCACCATGTAT  | GGGCGAGTCTGTCAGTTCAA  |
| M <i>Pc</i>    | CTGCAGCAAGTTTGGTTGCG  | TAGATGTTAGCTCCGCCCTG  |
| M <i>Fbp1</i>  | GCACAGCTCTATGGTATCGCT | CACAGGTAGCGTAGGACGAC  |
| M <i>Gapdh</i> | ACCCTTAAGAGGGATGCTGC  | CGGGACGAGGAAACACTCTC  |
| M <i>Pgk</i>   | GGCATTCTGCACGCTTCAAA  | CGACATTTTGGCAACACCGT  |
| M <i>Pgam</i>  | CGCCTCAATGAGCGACACTA  | TCACCATGCTTAGCAGCAGT  |
| M <i>Aldoa</i> | CCTAGCCGCGTTCGCTC     | GACAGGCGGGTCATGTTGAAG |
| M <i>Gpi</i>   | GACACCCTTCATTCTGGGGG  | TCCCACATGATGCCCTGAAC  |
| H <i>ASCT1</i> | TCTCCTCGCCTTTCTCGCAC  | AAAGACGGGGTTCCCAATGA  |
| H <i>ASCT2</i> | GTAACCGCTACTCCCGGACA  | CAGGGGACCCAGGCTCTTAG  |

---

**Supplementary Table 11.** Primer sequences used for ChIP assay.

| <b>Gene</b>       | <b>Forward primer</b>   | <b>Reverse primer</b>  |
|-------------------|-------------------------|------------------------|
| M <i>Cidea</i> p1 | CCTGTTAGGACACTCCGCTC    | GGGGTGACTGGTGACATCAT   |
| M <i>Cidea</i> p2 | AACAAGCGAATCCATCAGAGC   | ACAGGGTATCGGAGTGACCA   |
| M <i>Cidea</i> p3 | TGCTGGGAGGAGAGACACAA    | GGCCTCCAAGCTCACAGATA   |
| M <i>Cidea</i> p4 | CAAGGGGCTCCCTTTGTCTT    | TGGGGTGAGAGTCTGGAGAG   |
| M <i>Cidec</i> p1 | TTCCCATGCTCTTTTCCCC     | CCCAGGCTTCCCTCCATTTT   |
| M <i>Cidec</i> p2 | GCTCAGGCTTGTCTTGAATTAGA | GGGGTGGGAAATCACAAAAGTT |
| M <i>Cidec</i> p3 | ACCTTTAGTCCCGGCTCTCT    | AGGGATCTGTCACCTCGTCA   |
| M <i>Cidec</i> p4 | AGGCCGTCTTGCTTTCTGATG   | GCGACATTCCTTCATCGAGT   |
